# Supplementary material for: PS1/gamma-secretase acts as rogue chaperone of glutamate transporter EAAT2/GLT-1 in Alzheimer’s disease
Source: PubMed Central journal article supplement — Acta Neuropathol Commun. 2024 Oct 21;12:166. doi: 10.1186/s40478-024-01876-y (PMC11492509; doi:10.1186/s40478-024-01876-y), 2024-10-21

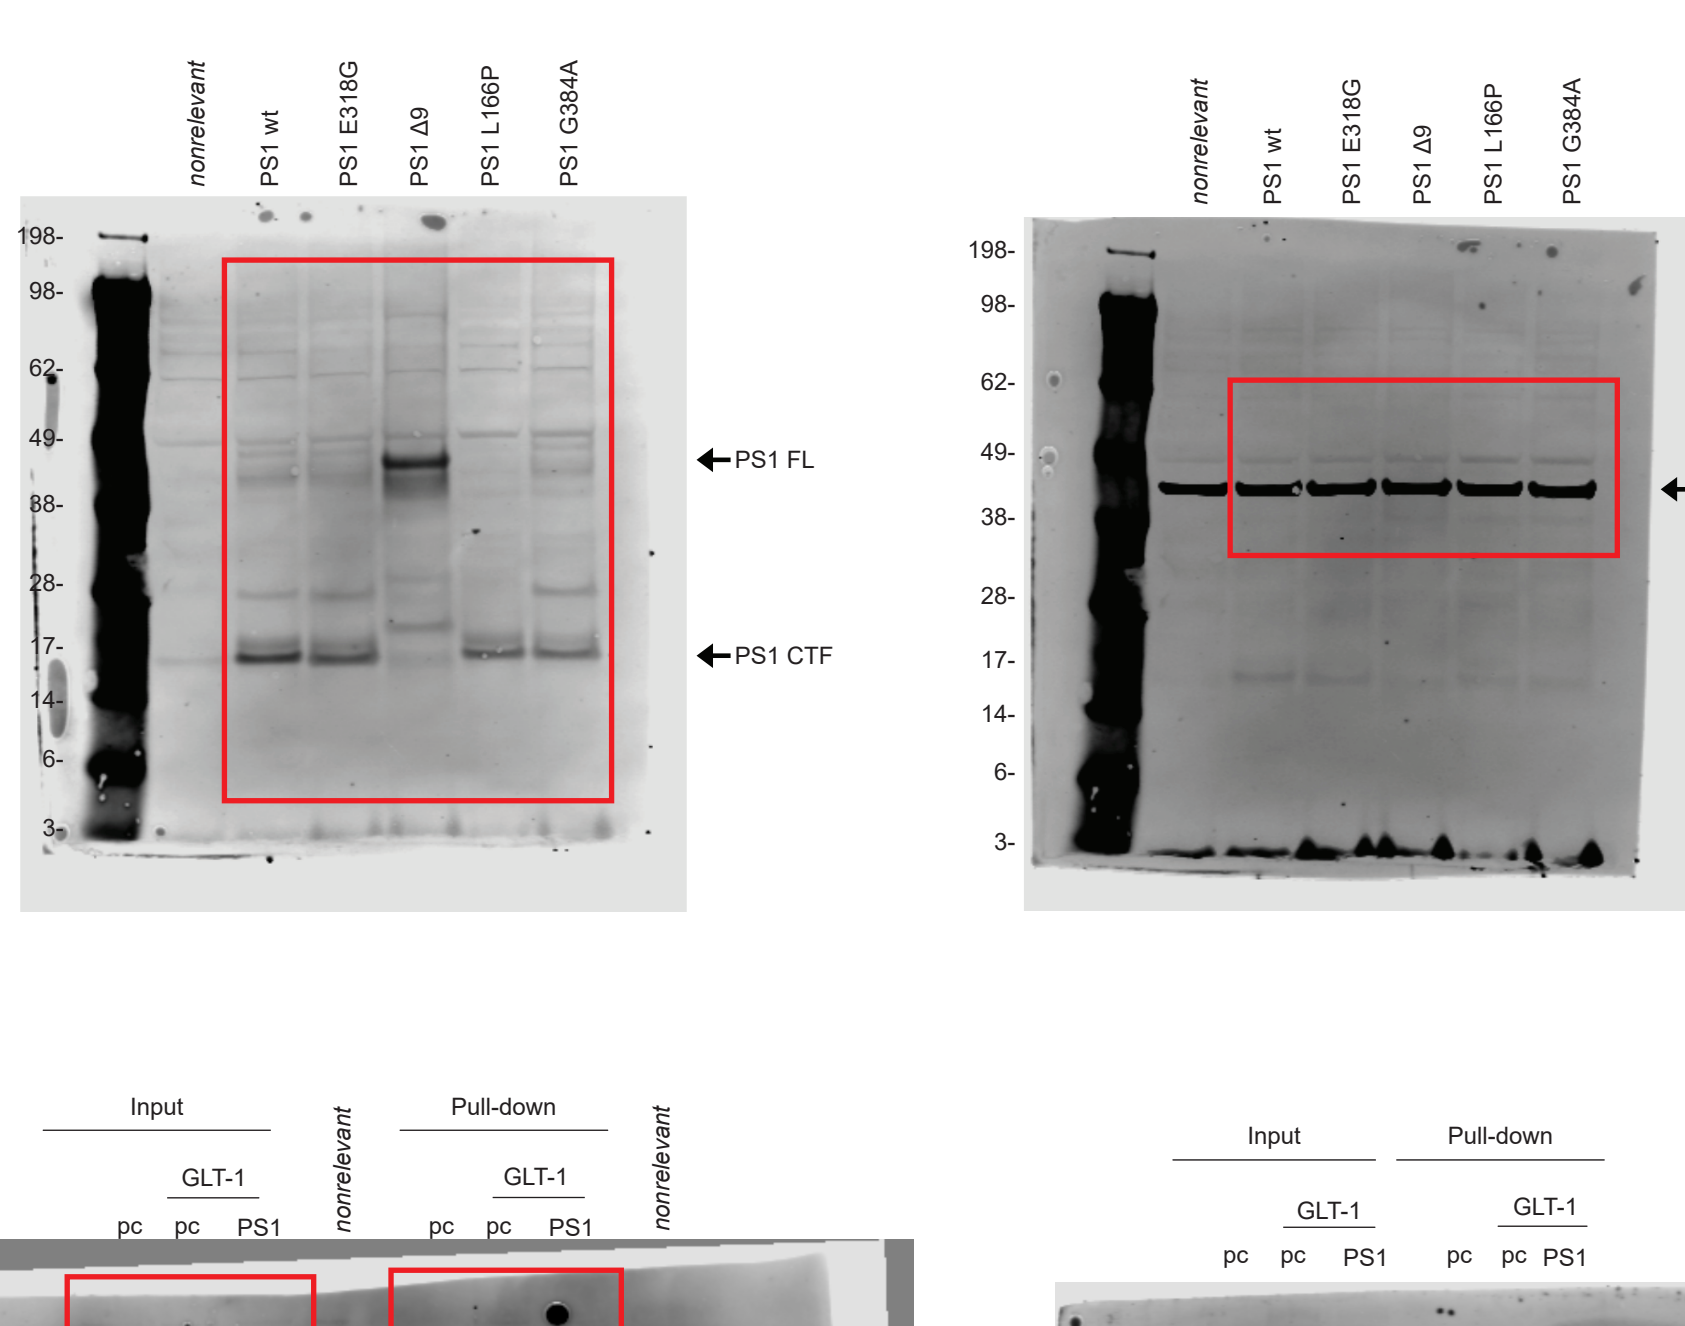

Figure 3

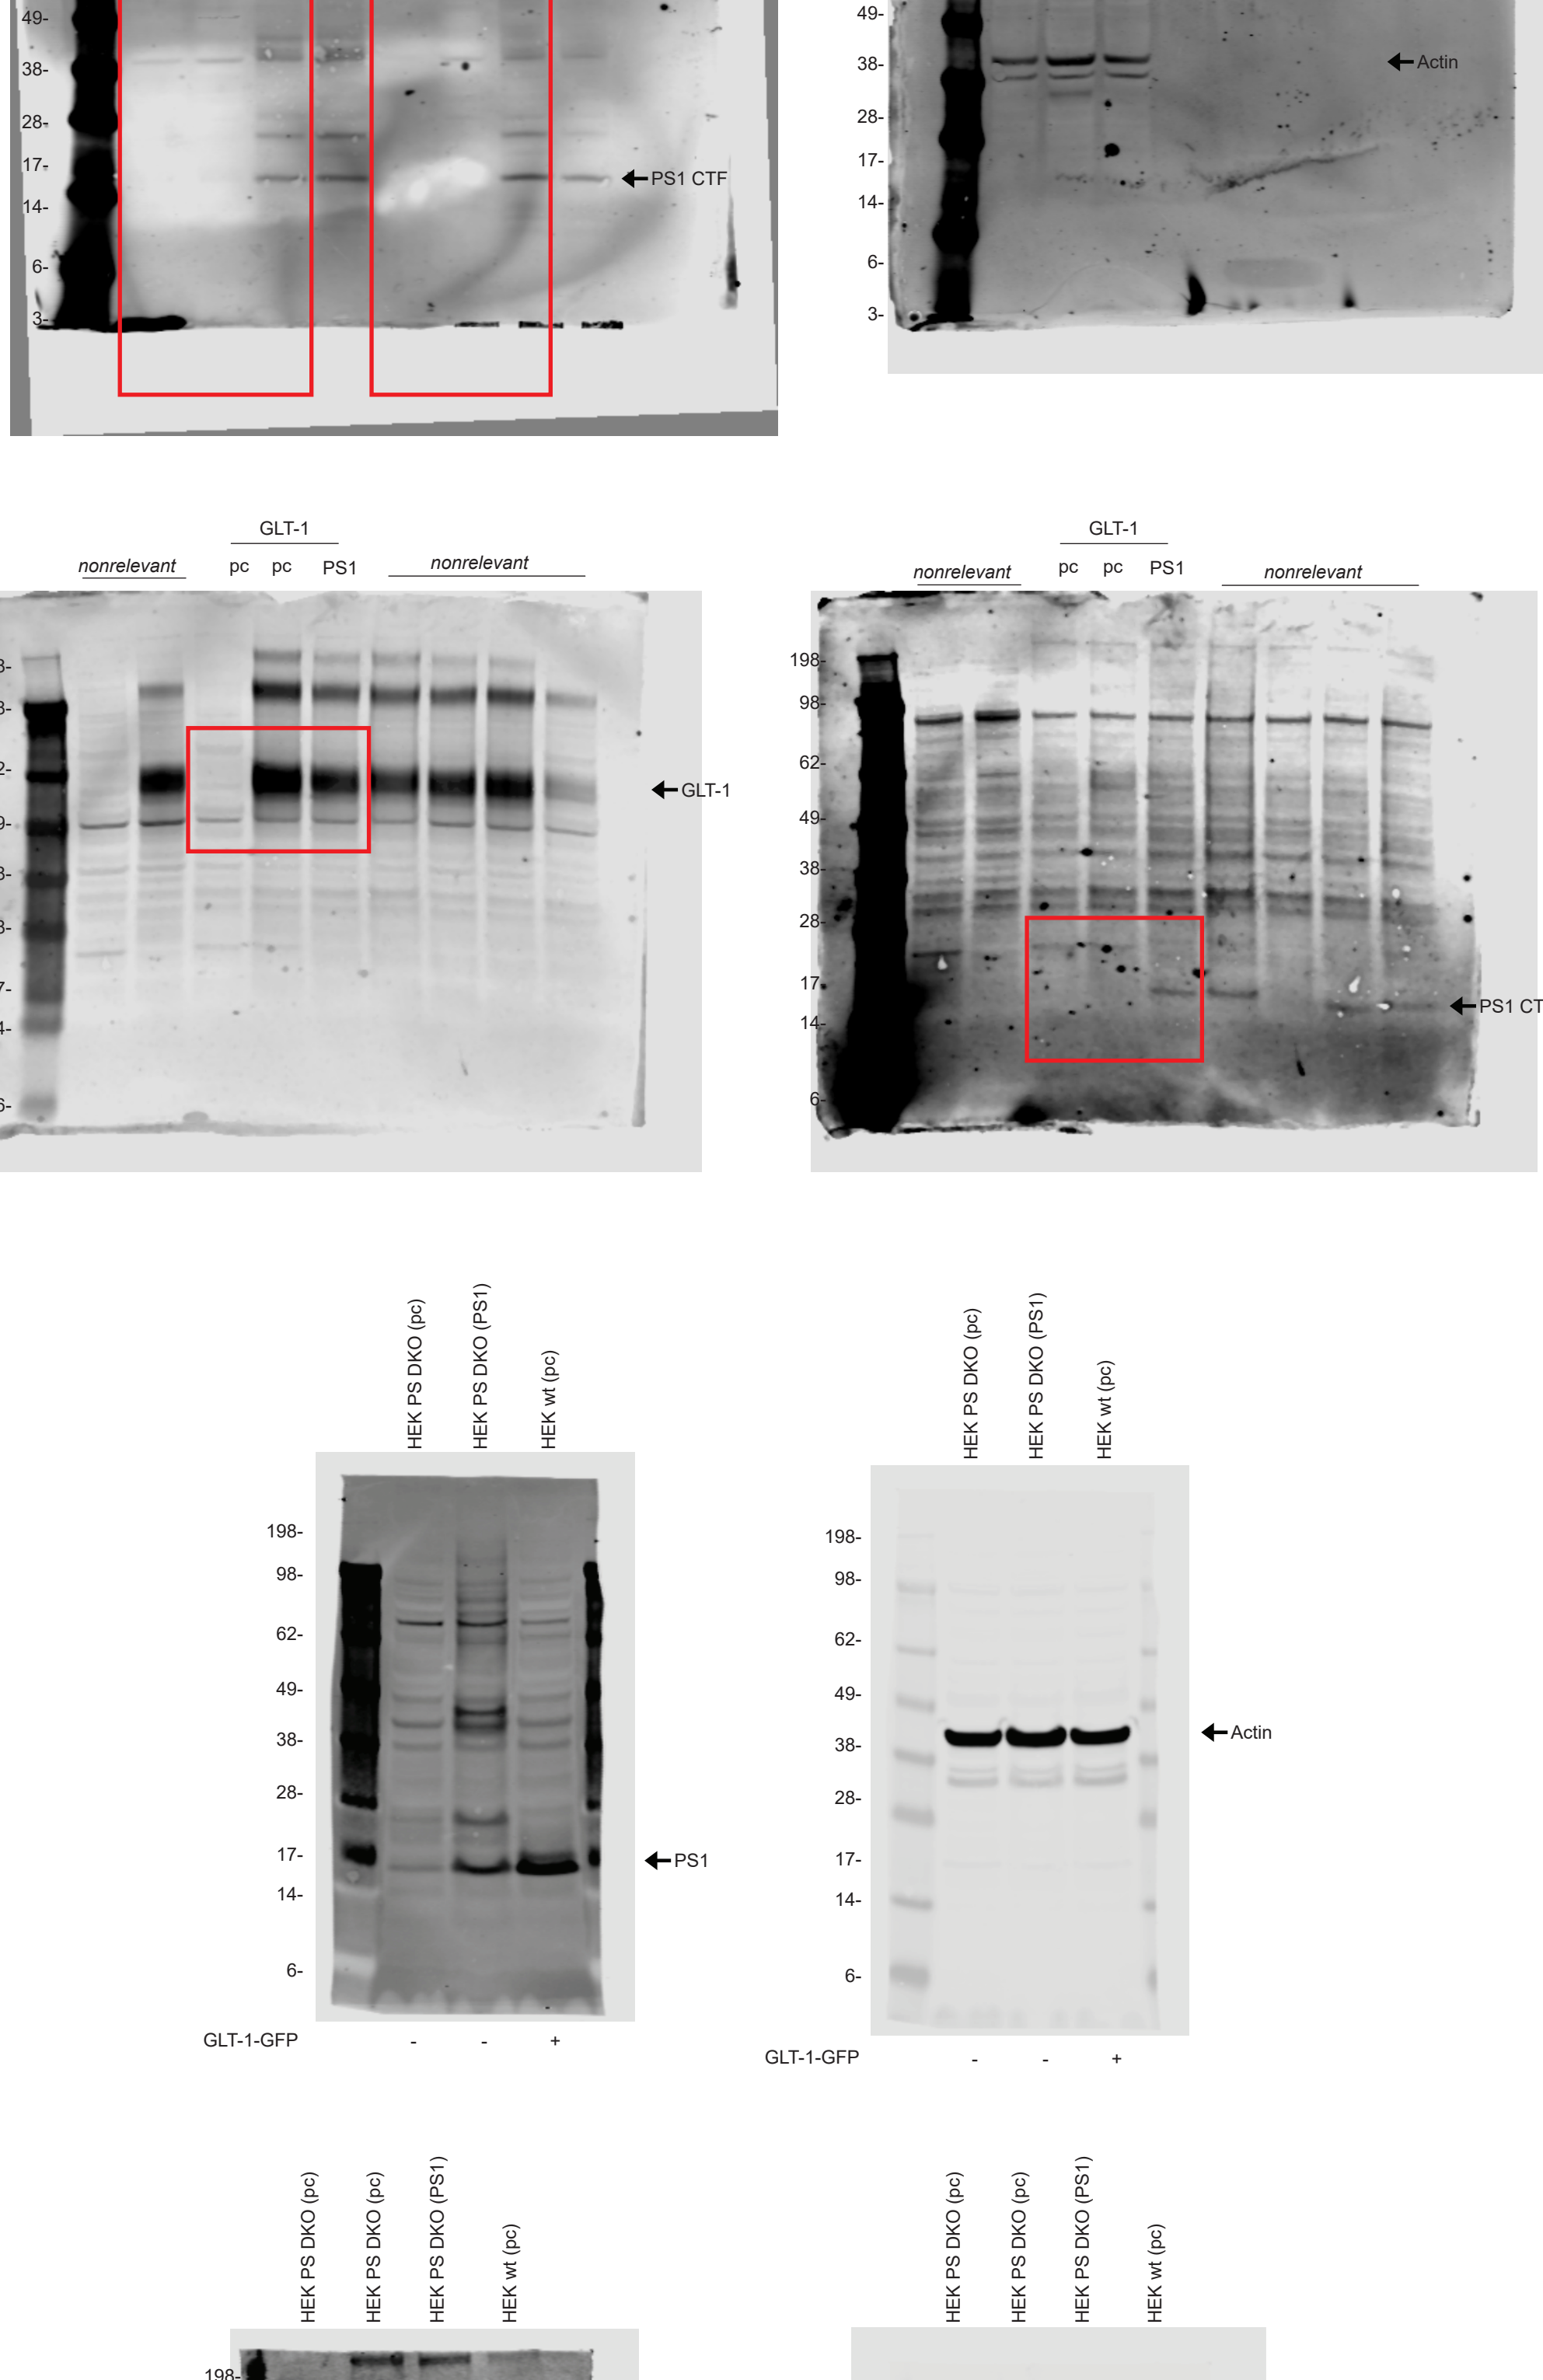

Figure 4

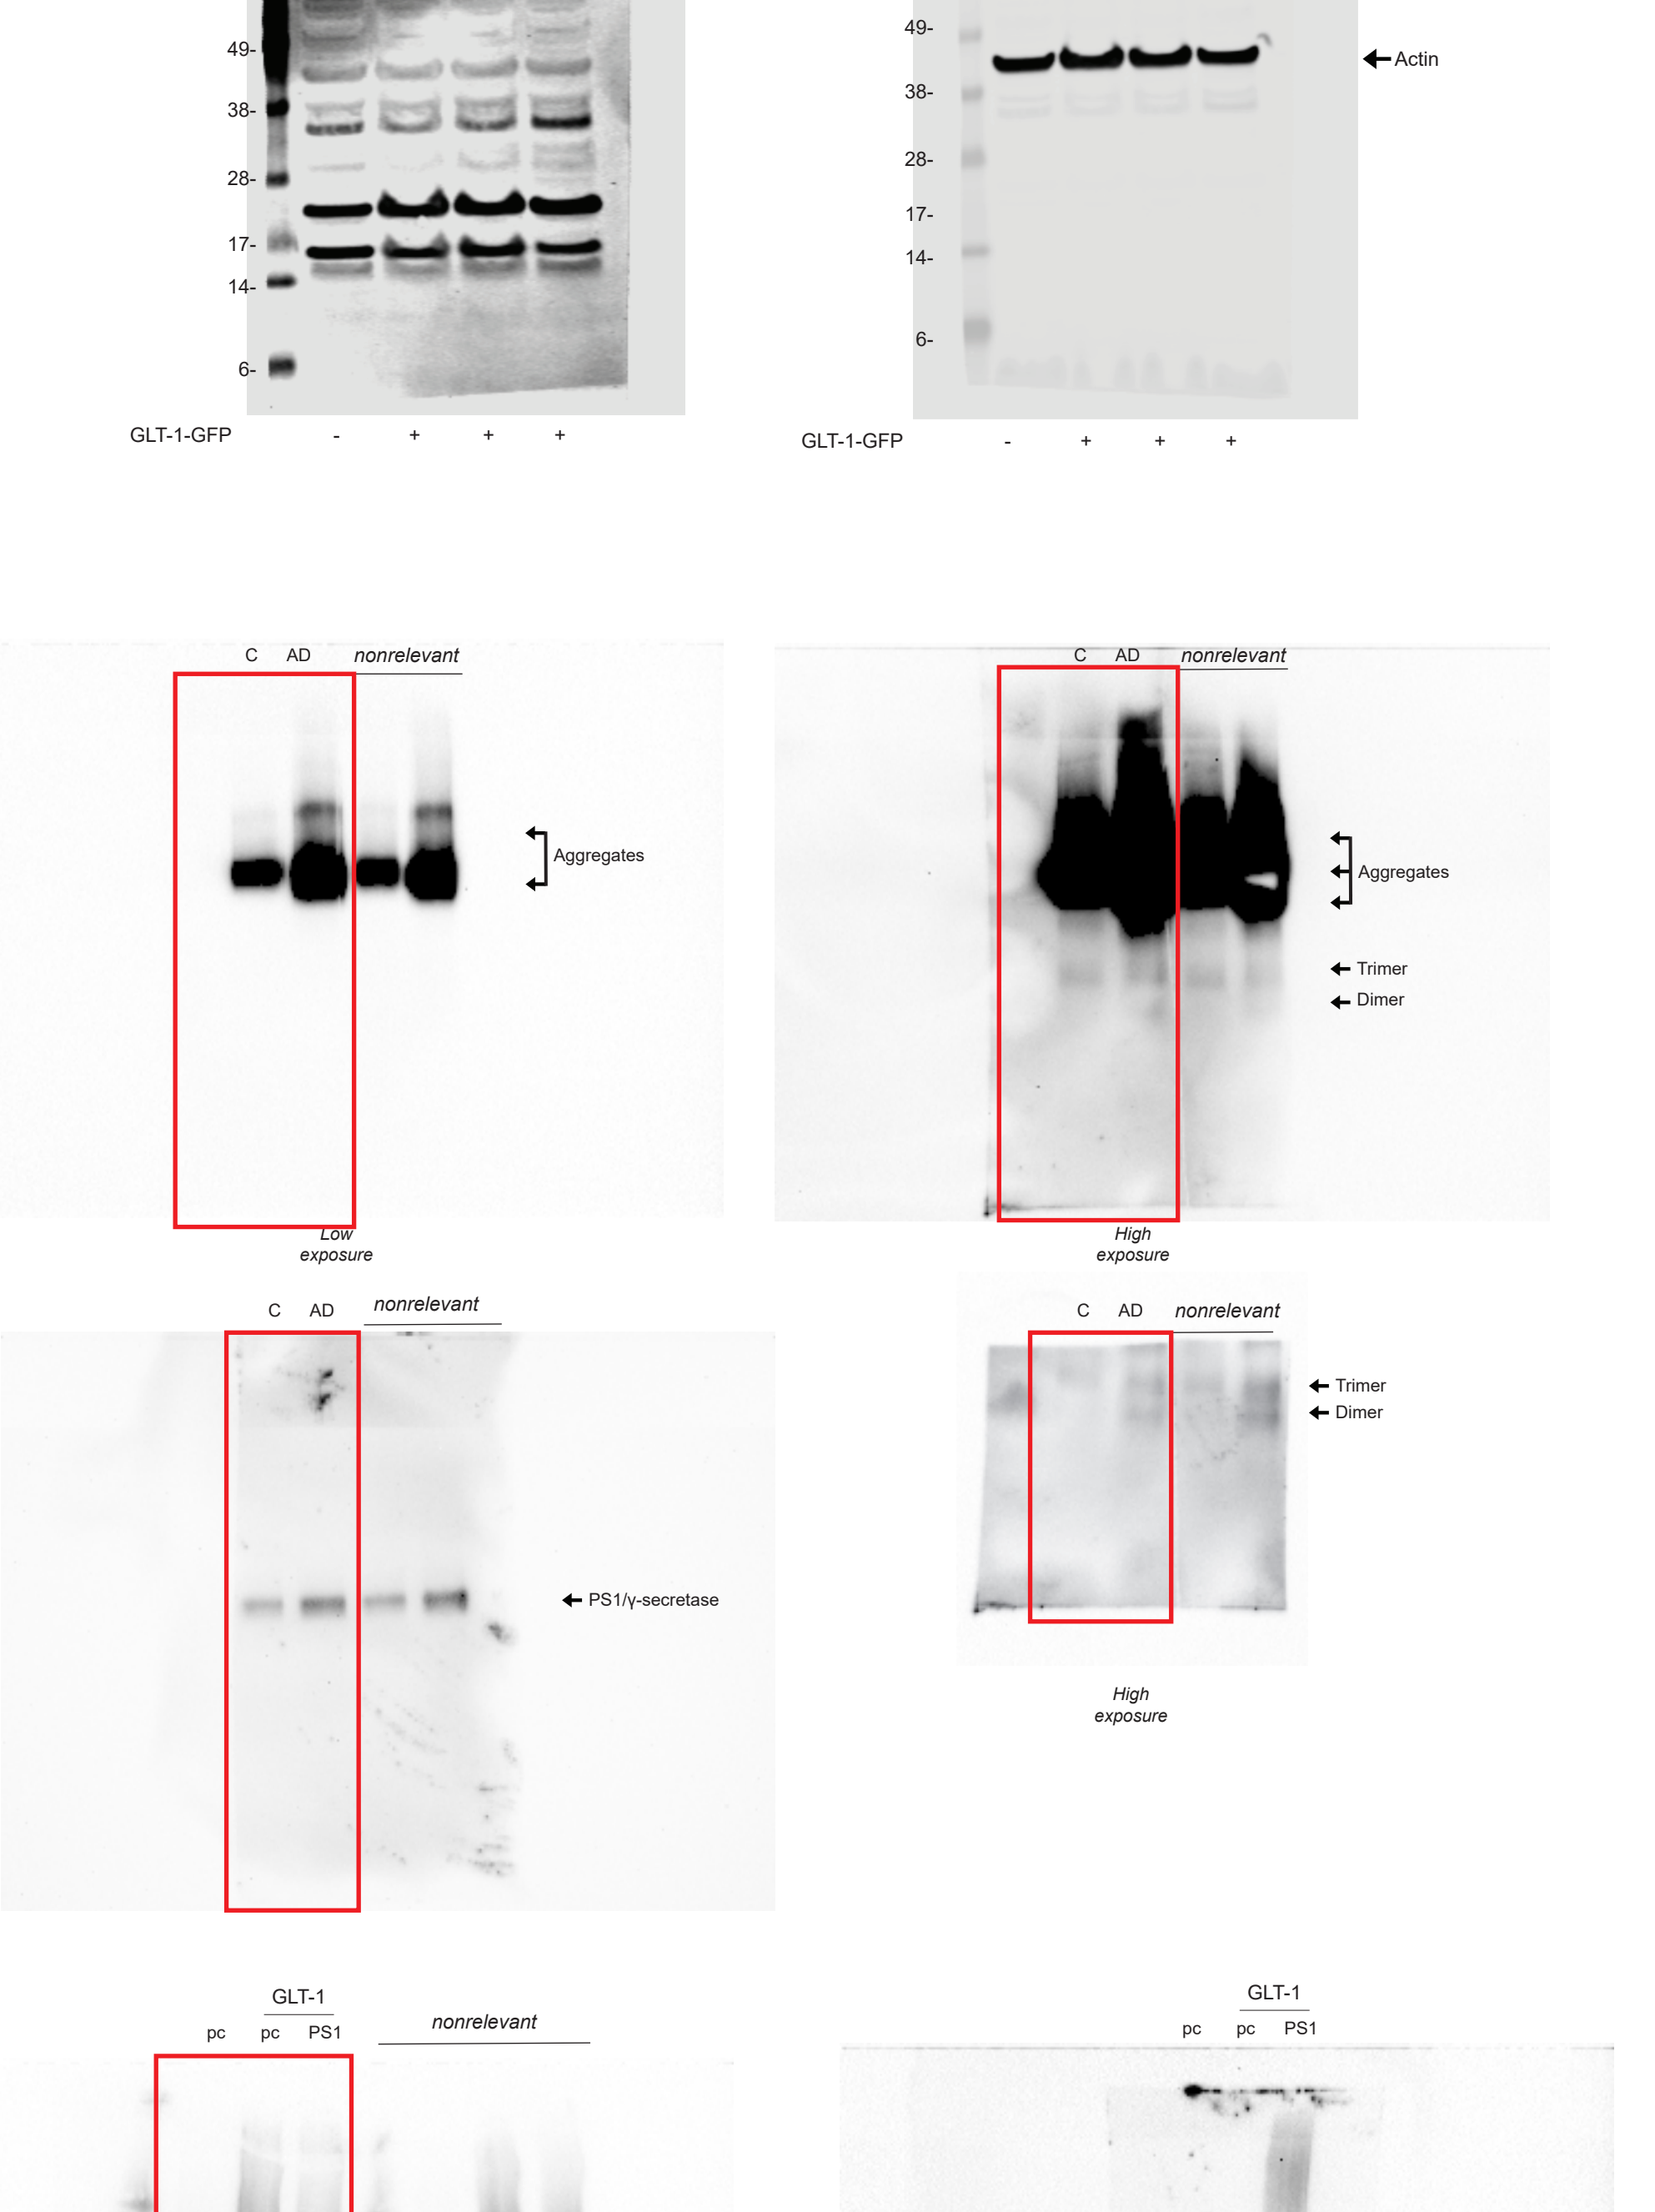

Figure 5

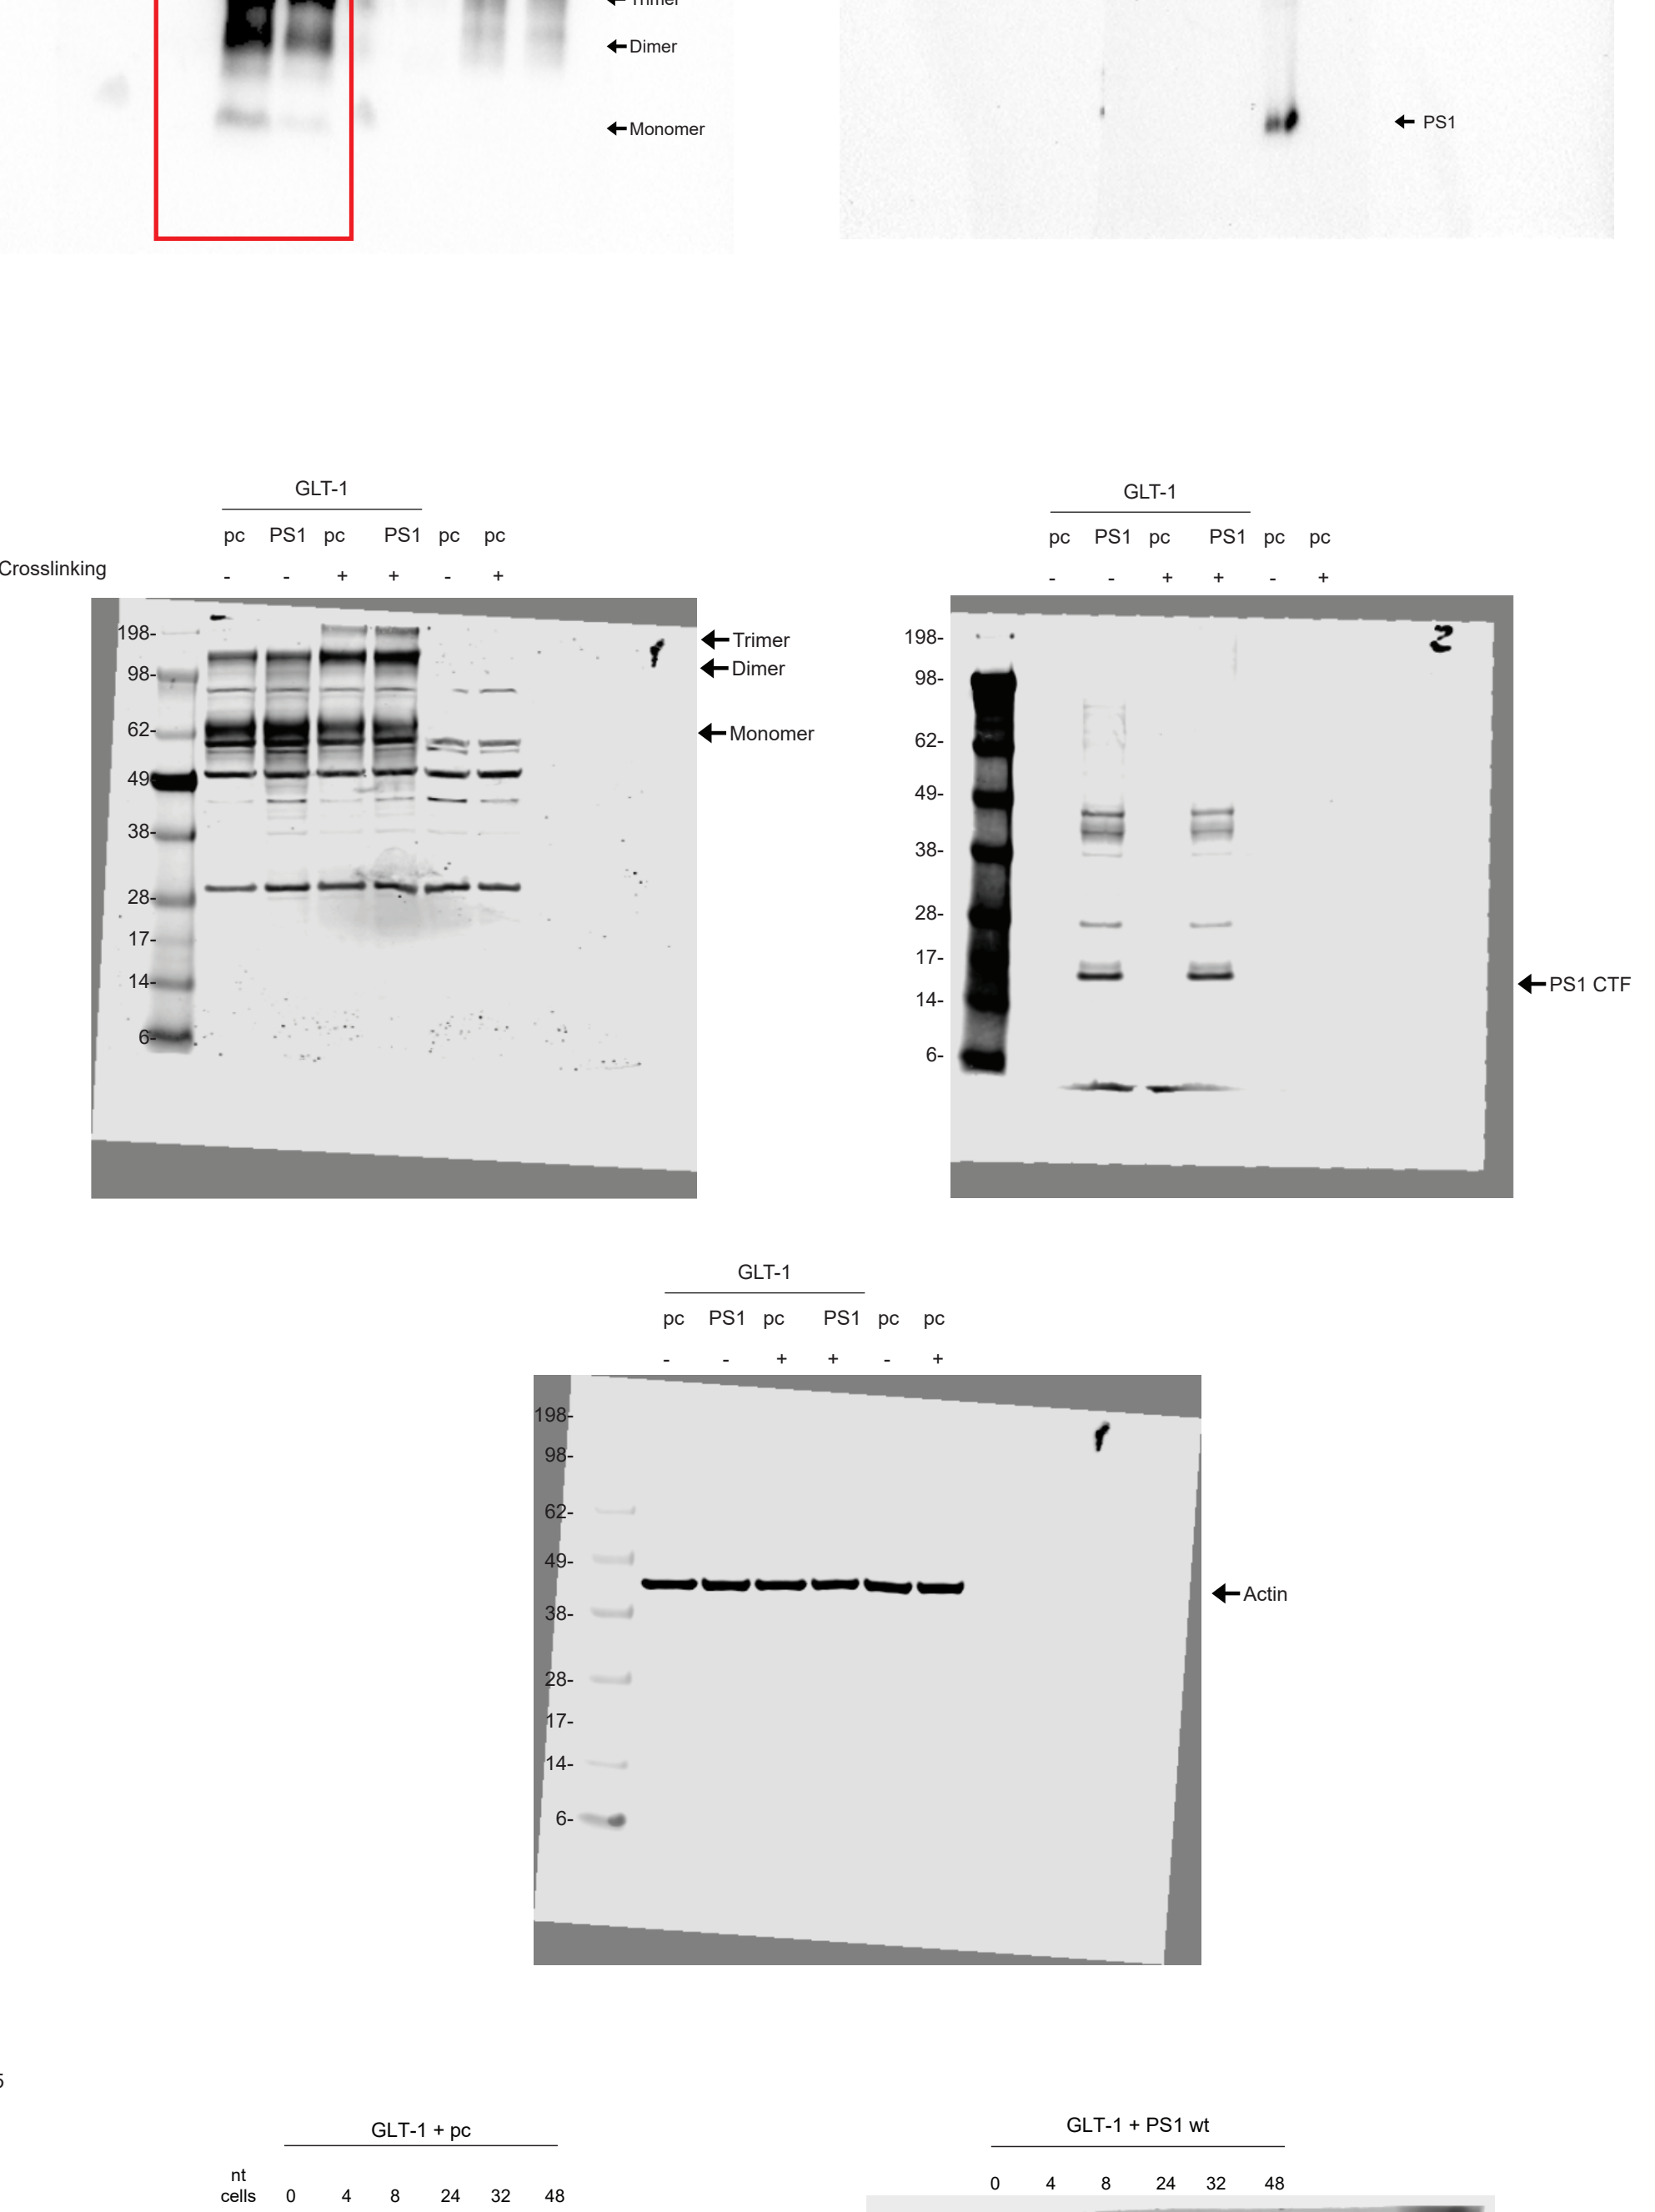

Figure 6

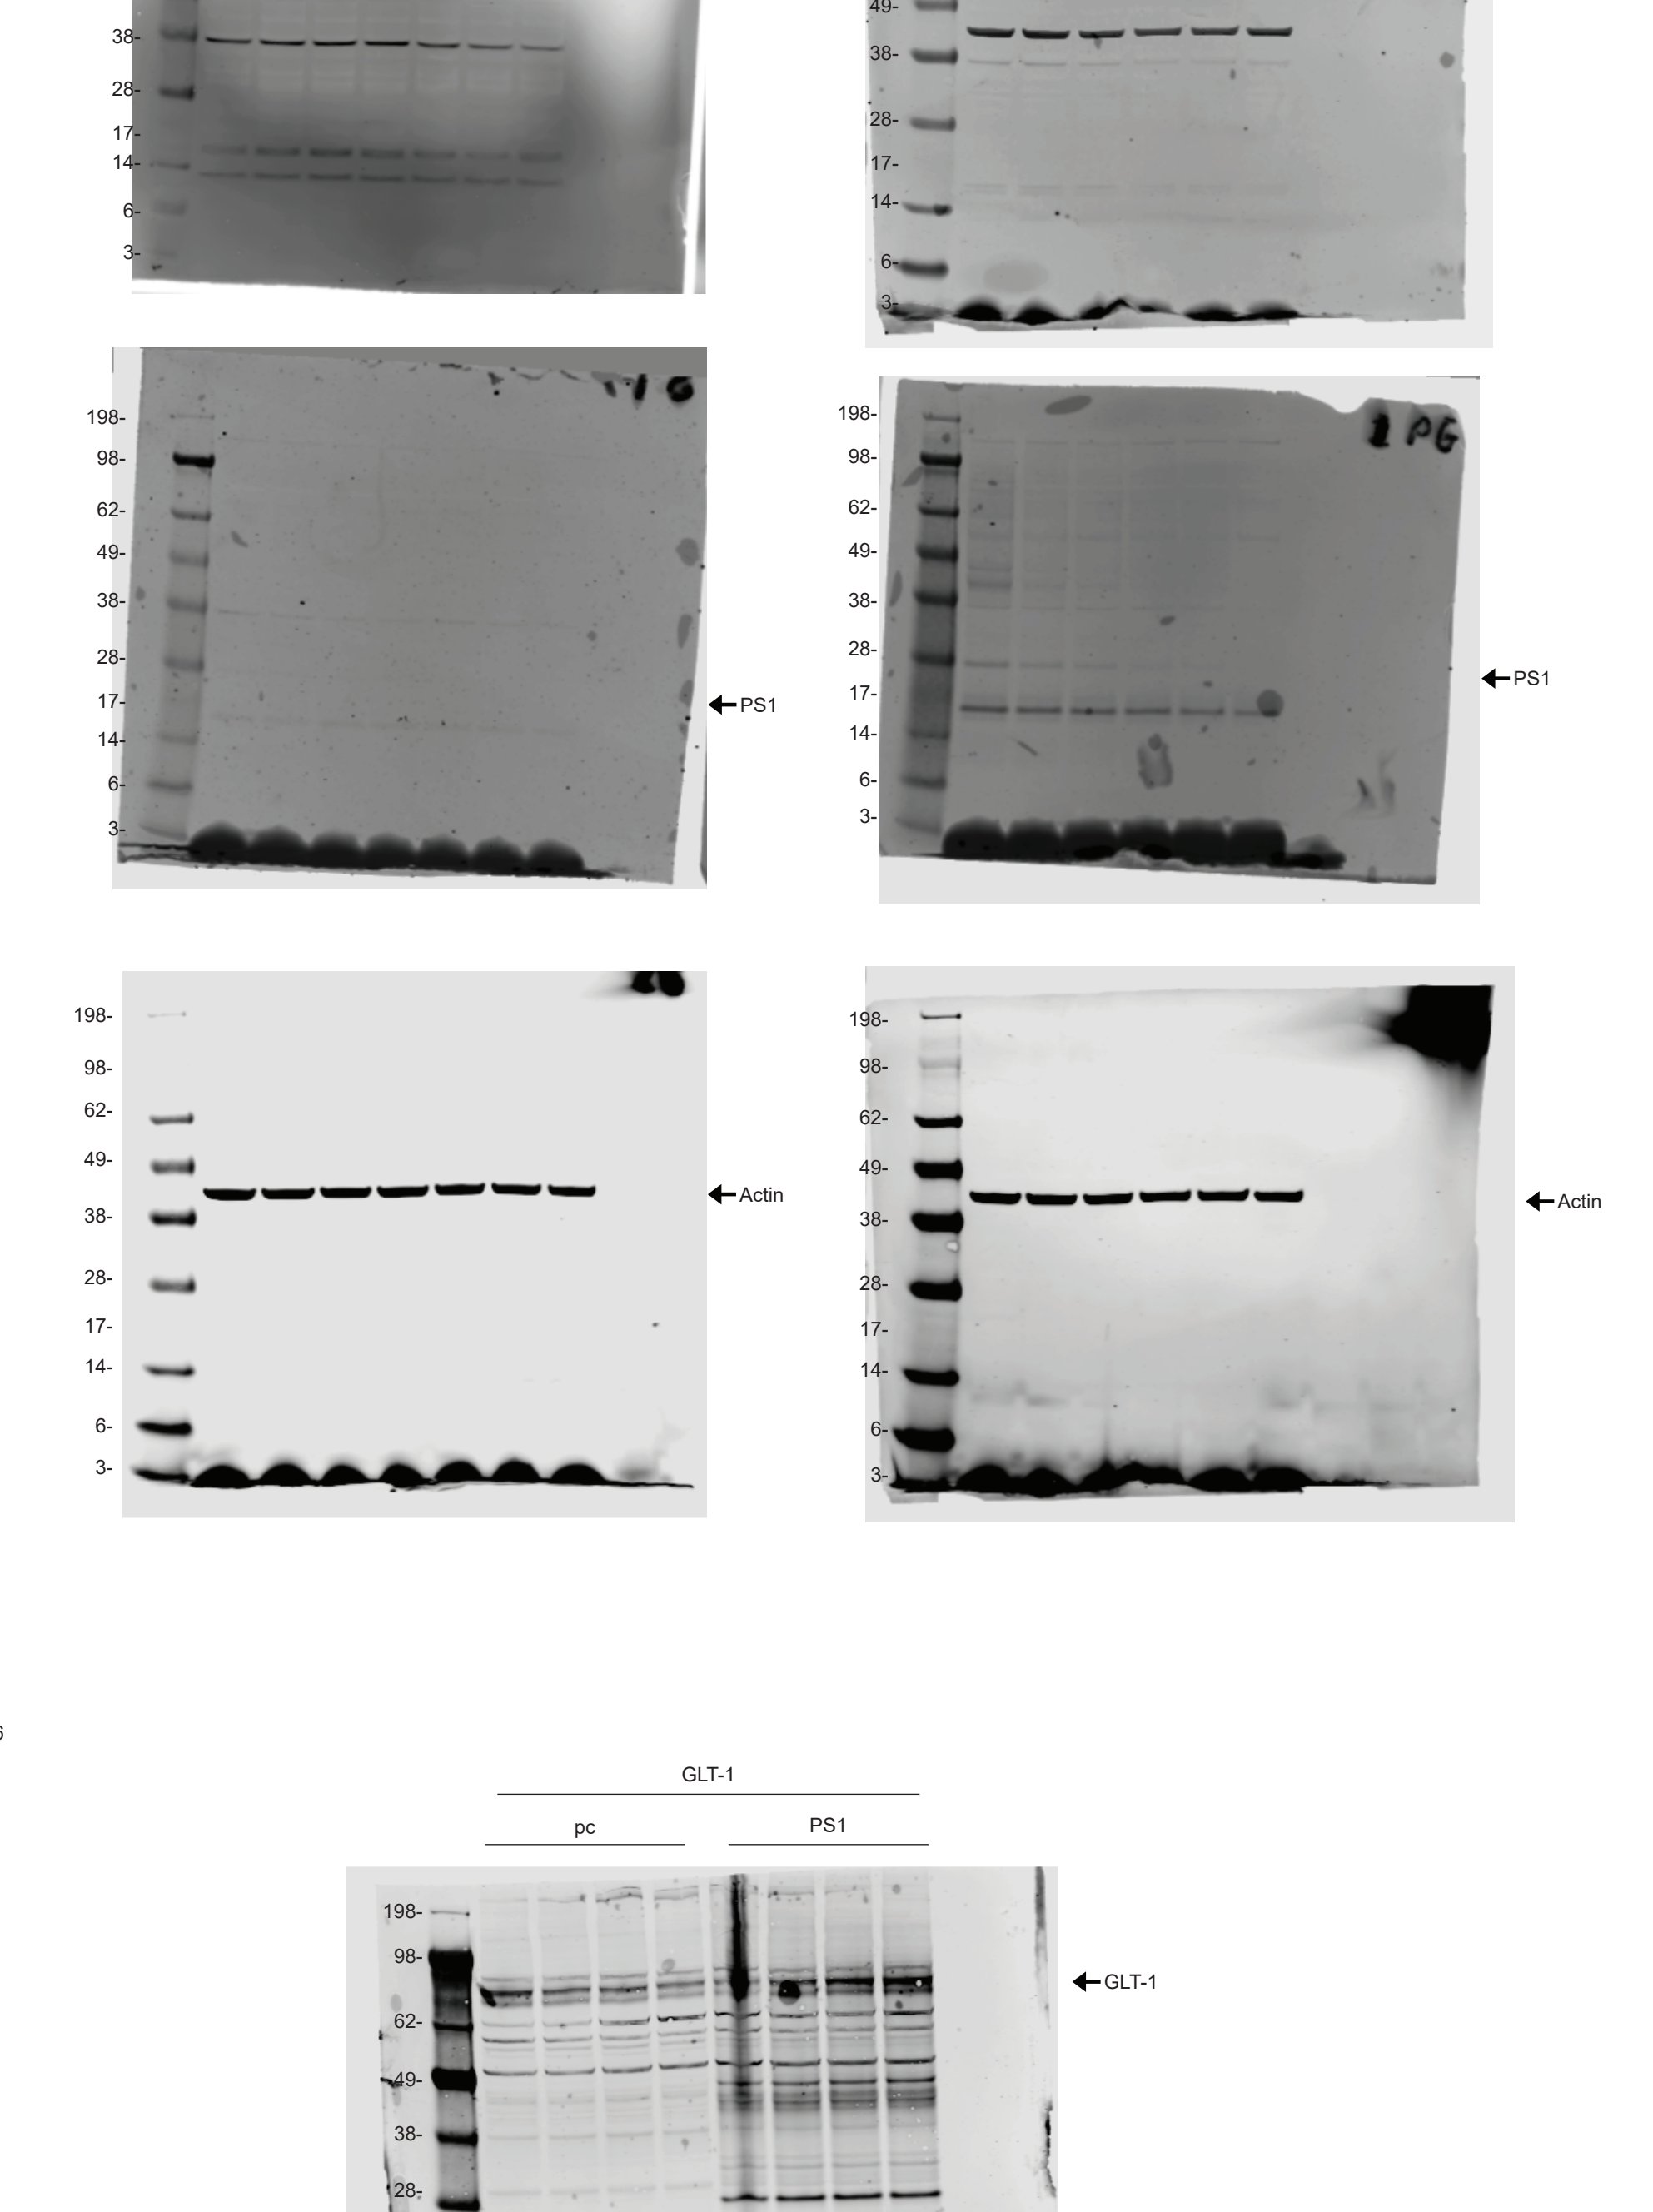

Supplementary Figure 3

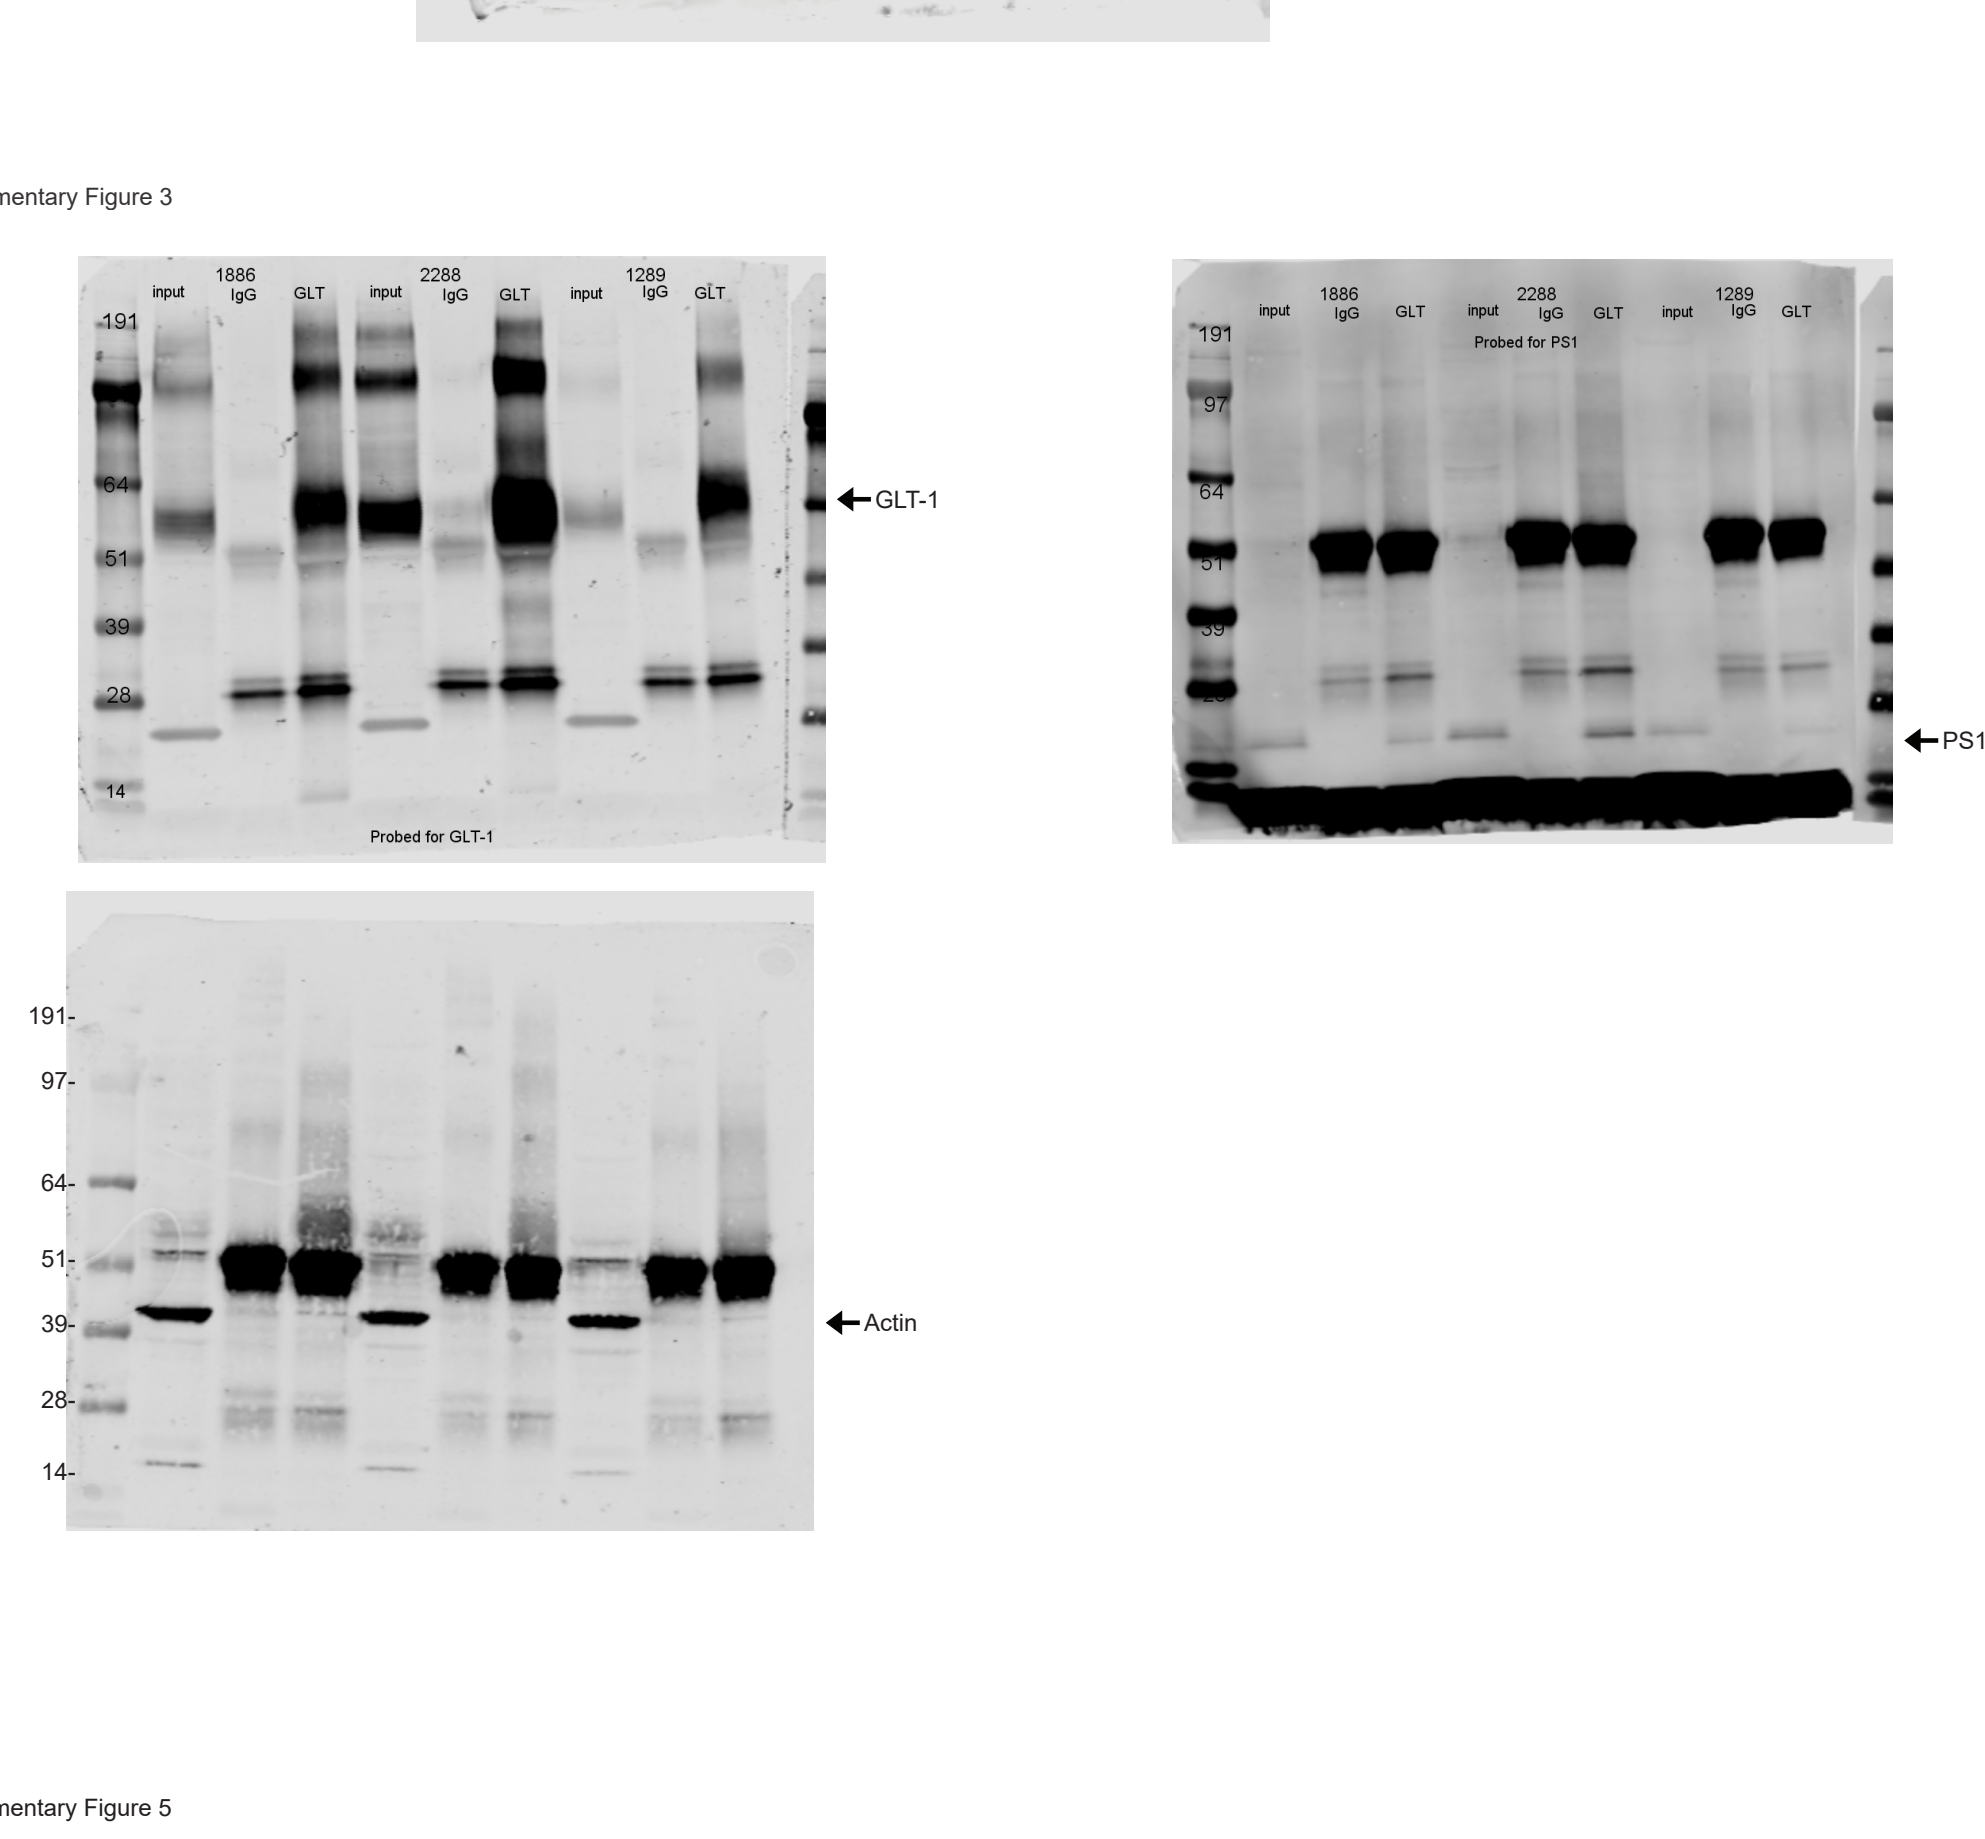

Supplementary Figure 5

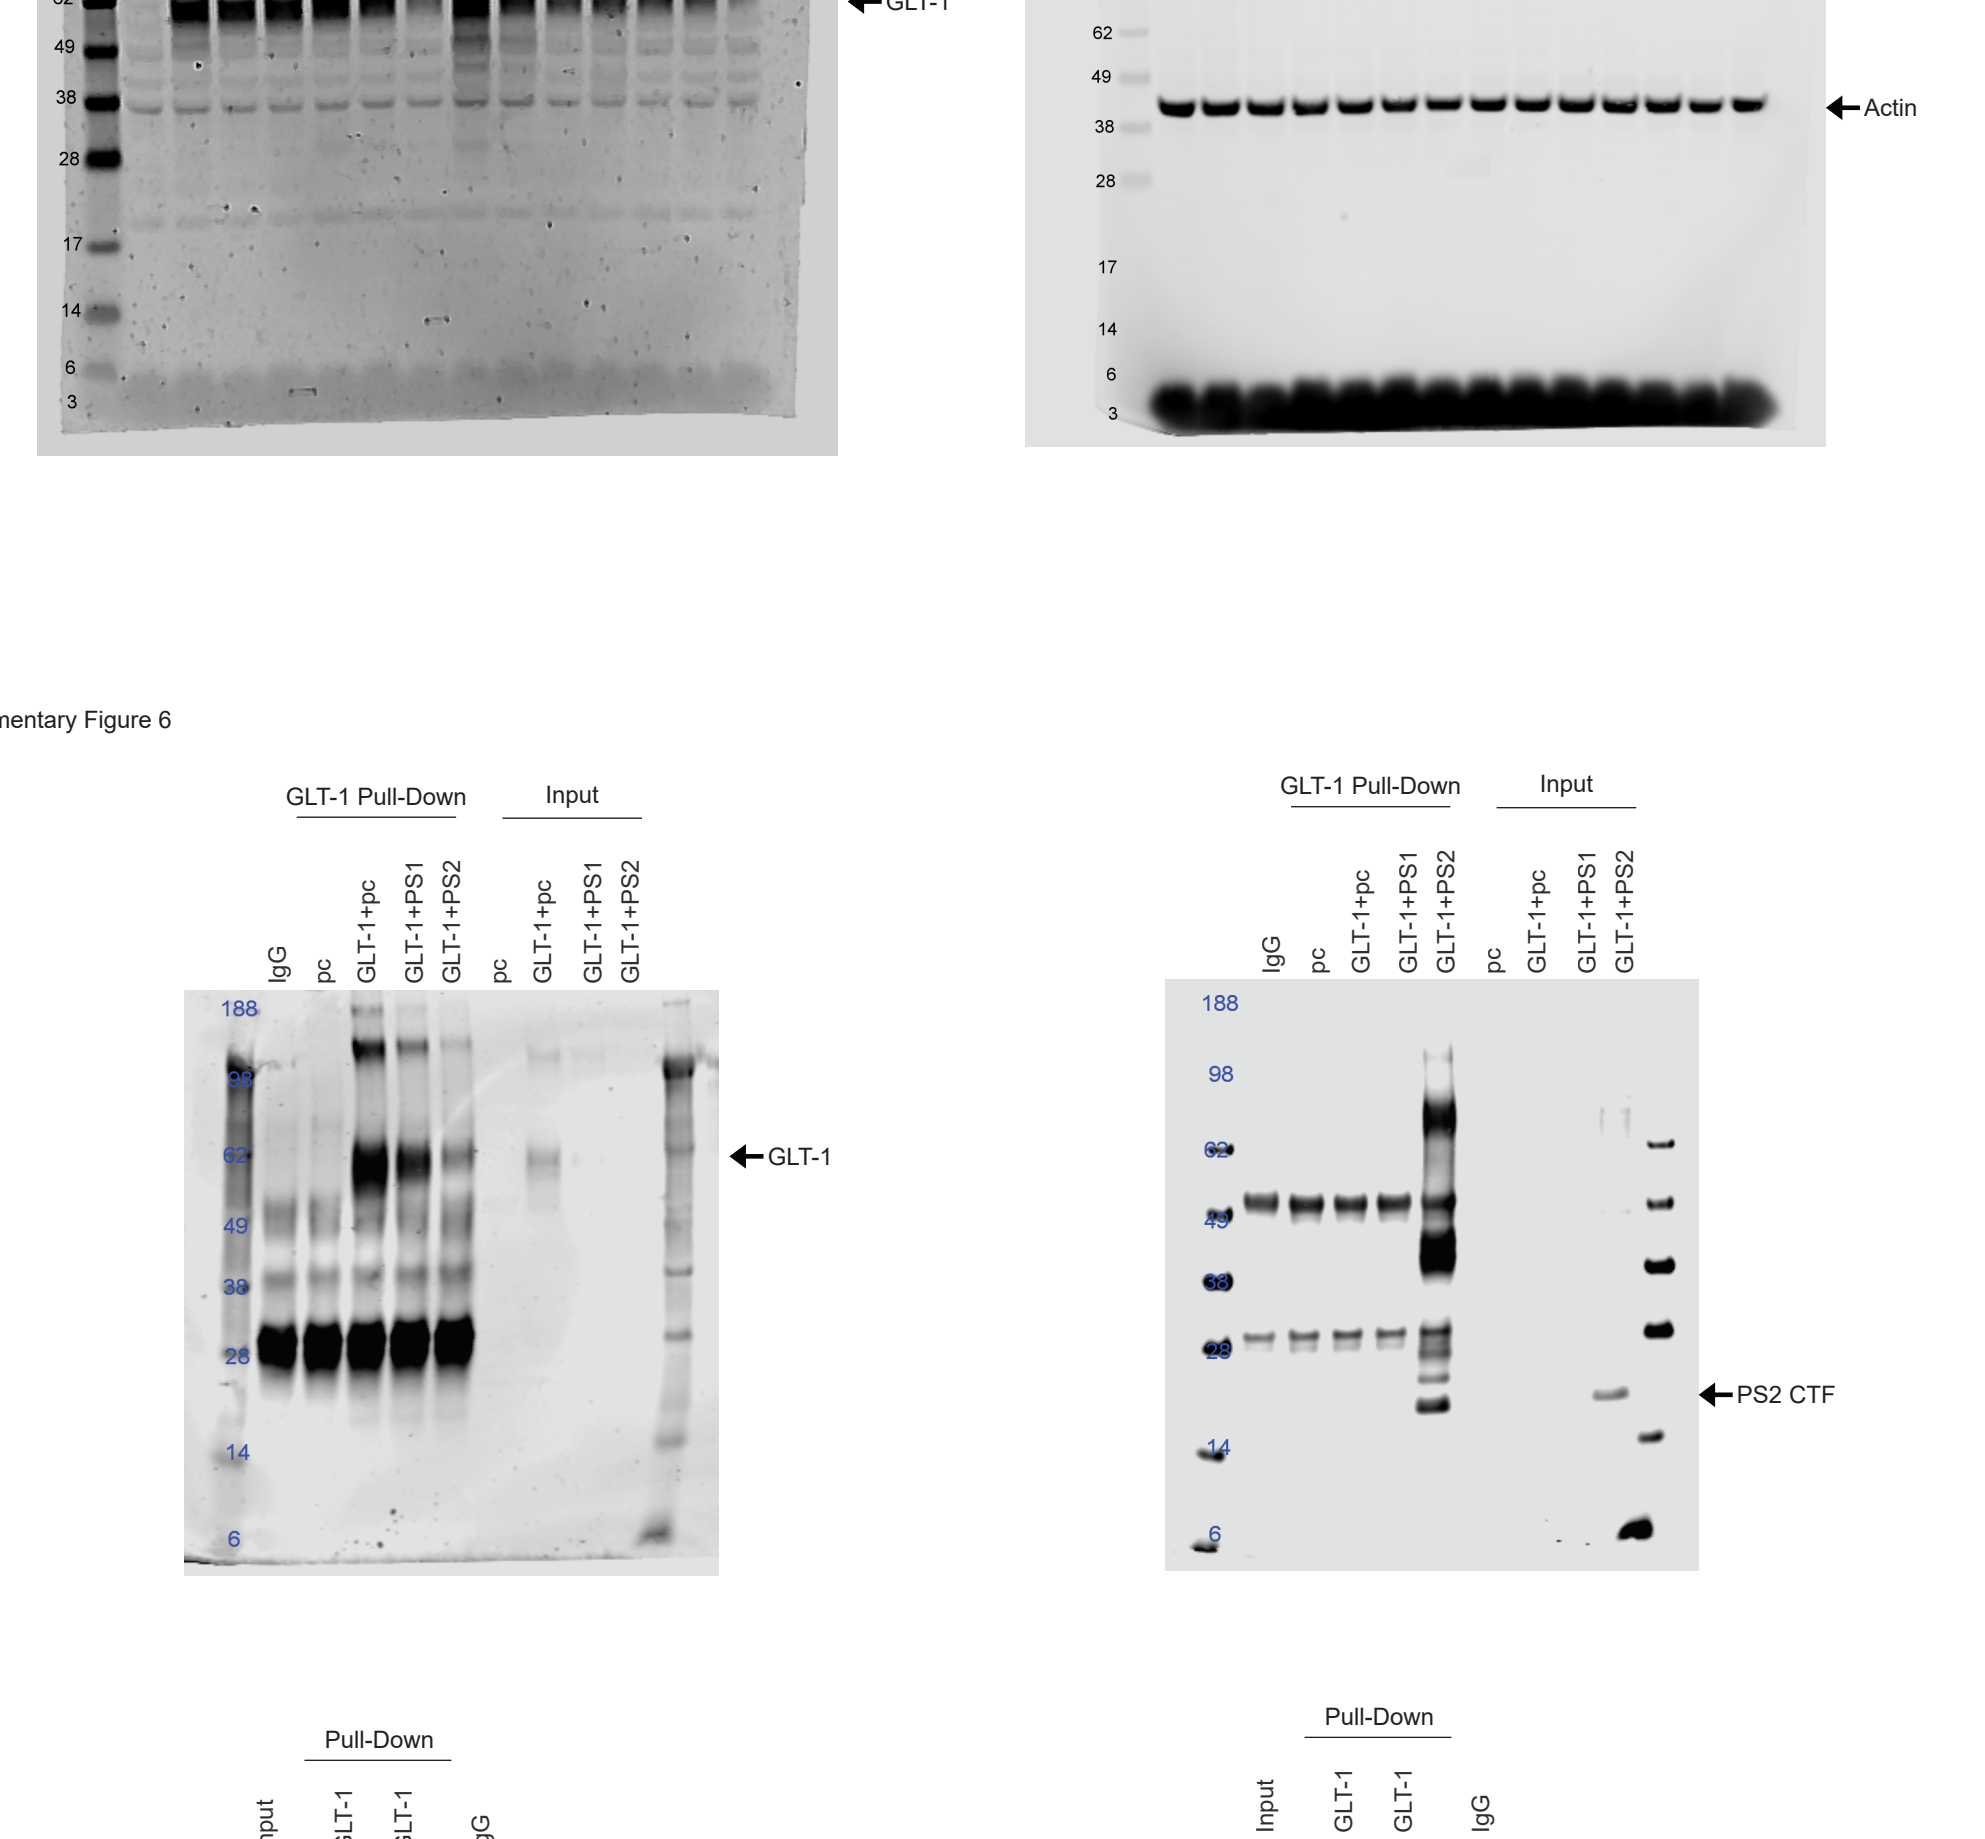

Supplementary Figure 6

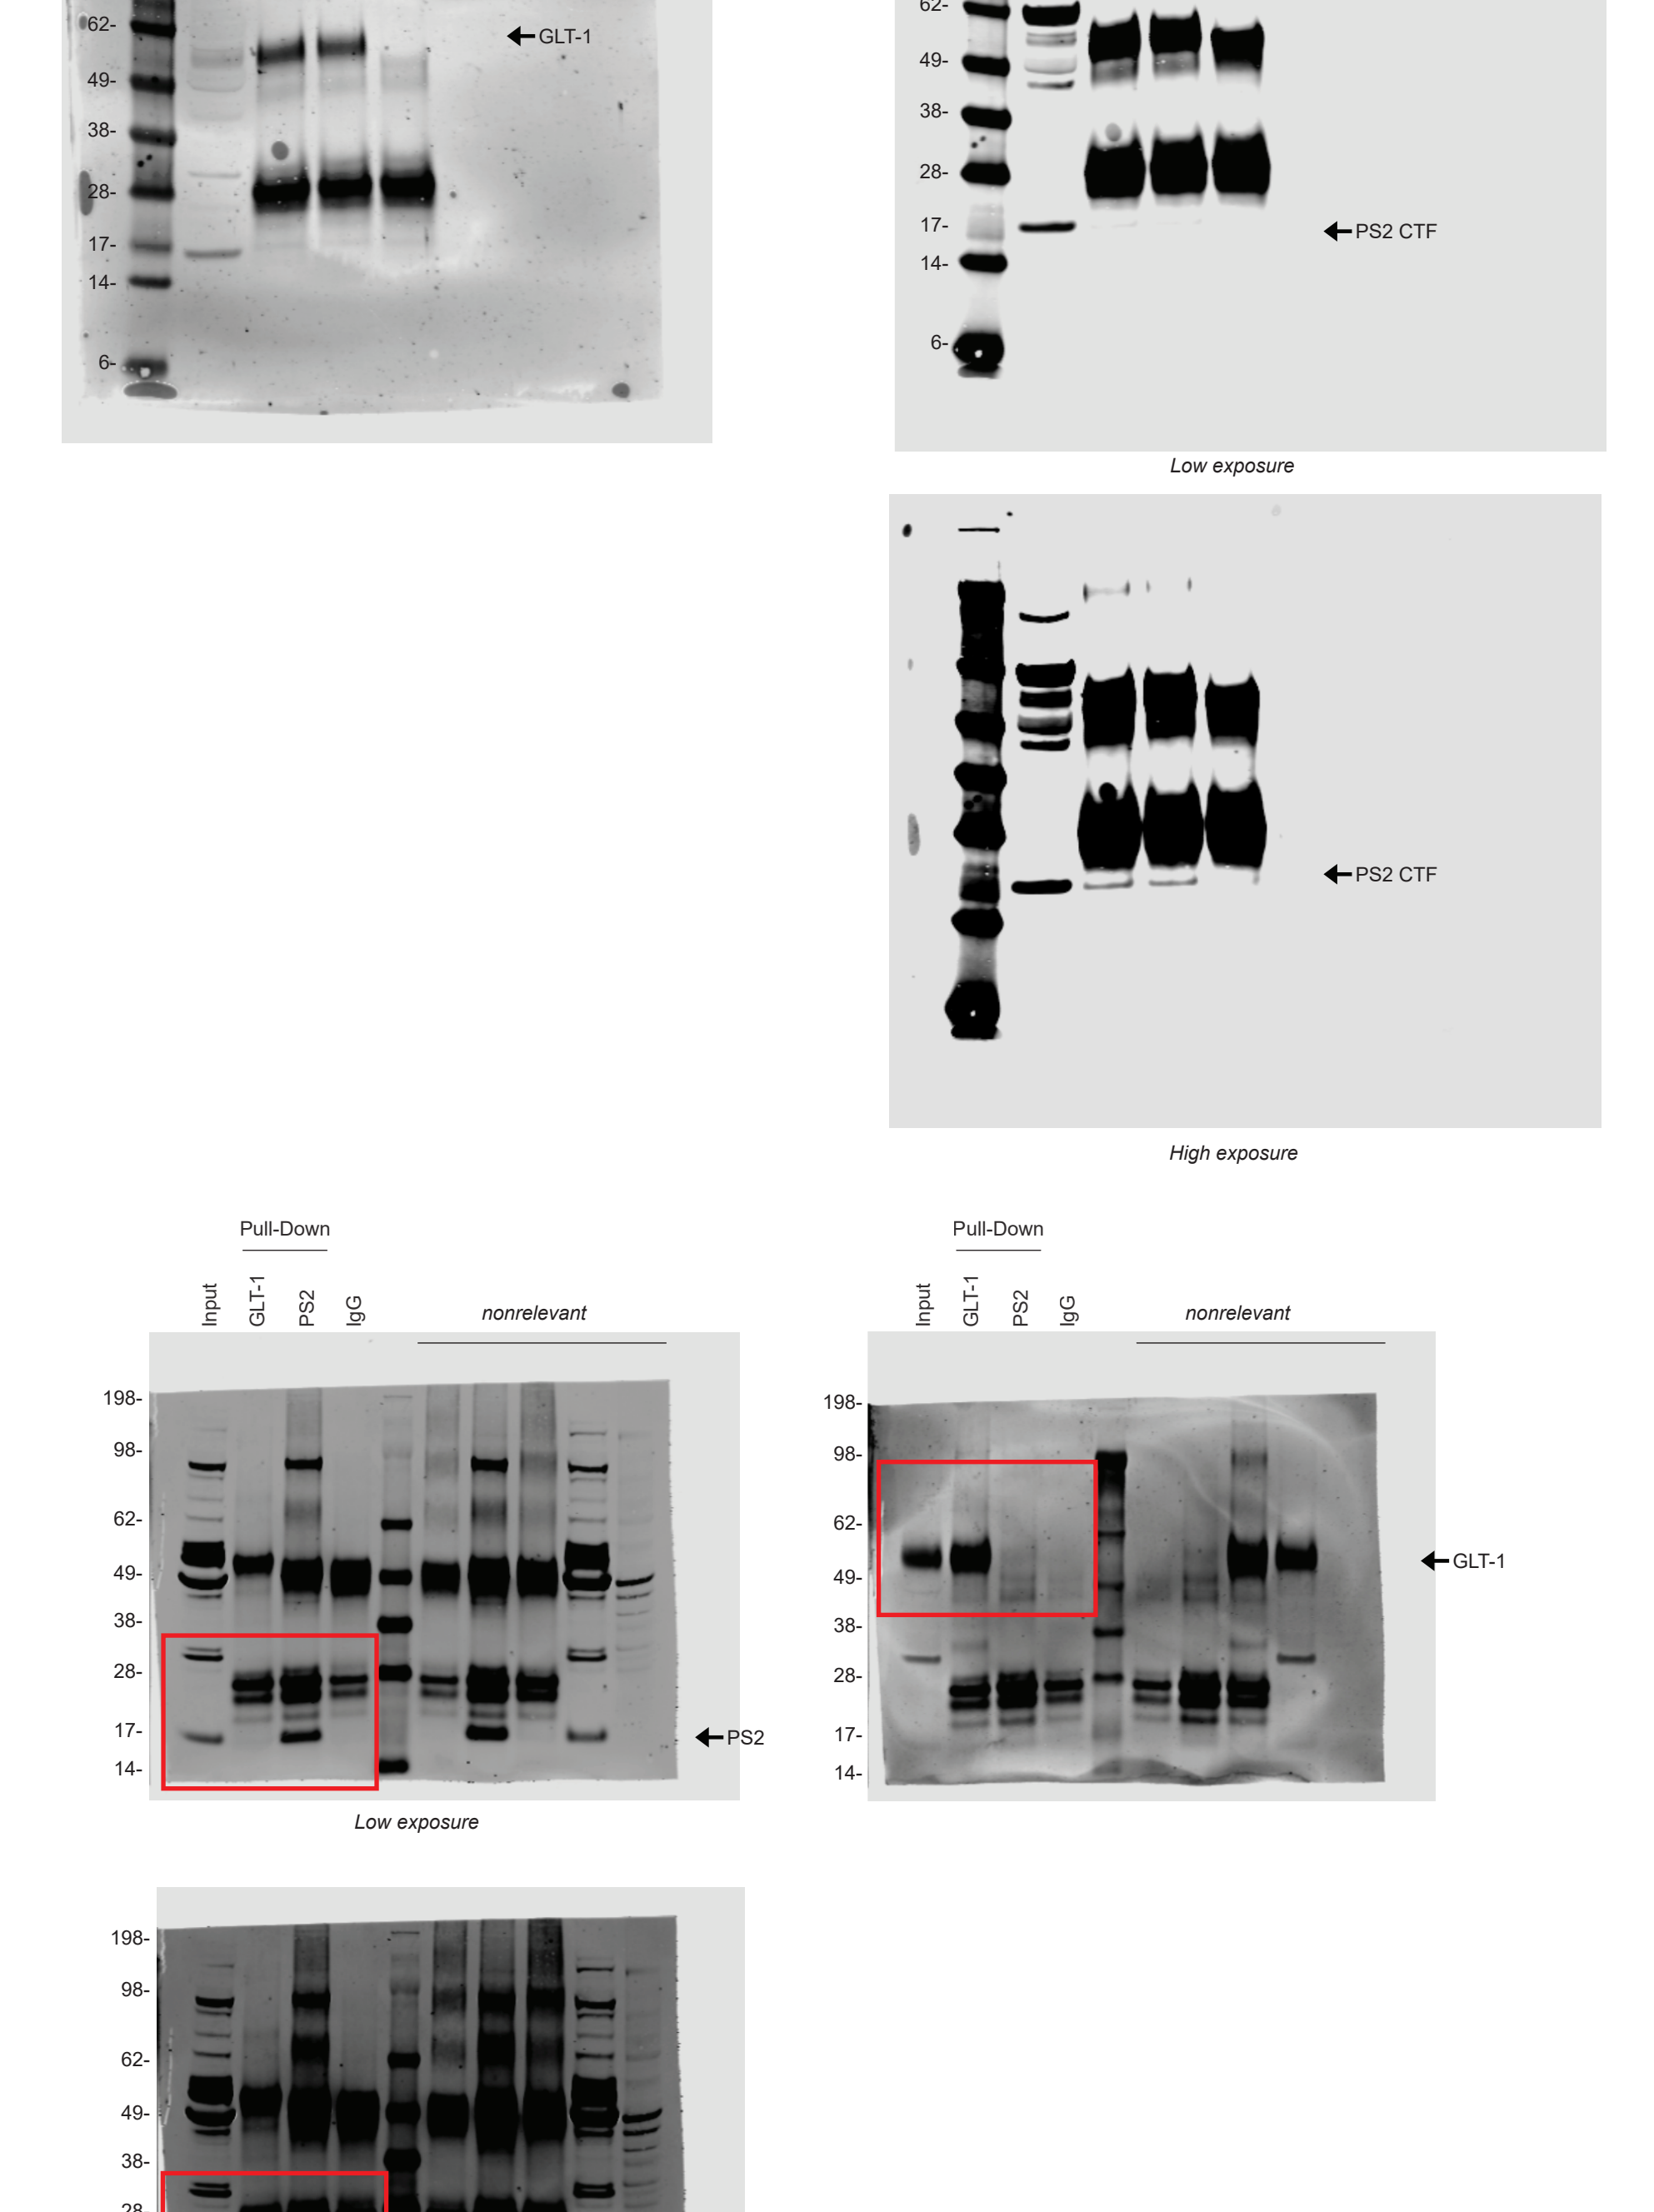

Supplement: 40478_2024_1876_MOESM7_ESM.pdf [file 40478_2024_1876_MOESM7_ESM.pdf]
