# Supplementary figures and images for: PS1/gamma-secretase acts as rogue chaperone of glutamate transporter EAAT2/GLT-1 in Alzheimer’s disease
Source: PubMed Central journal article supplement — Acta Neuropathol Commun. 2024 Oct 21;12:166. doi: 10.1186/s40478-024-01876-y (PMC11492509; doi:10.1186/s40478-024-01876-y), 2024-10-21

**a**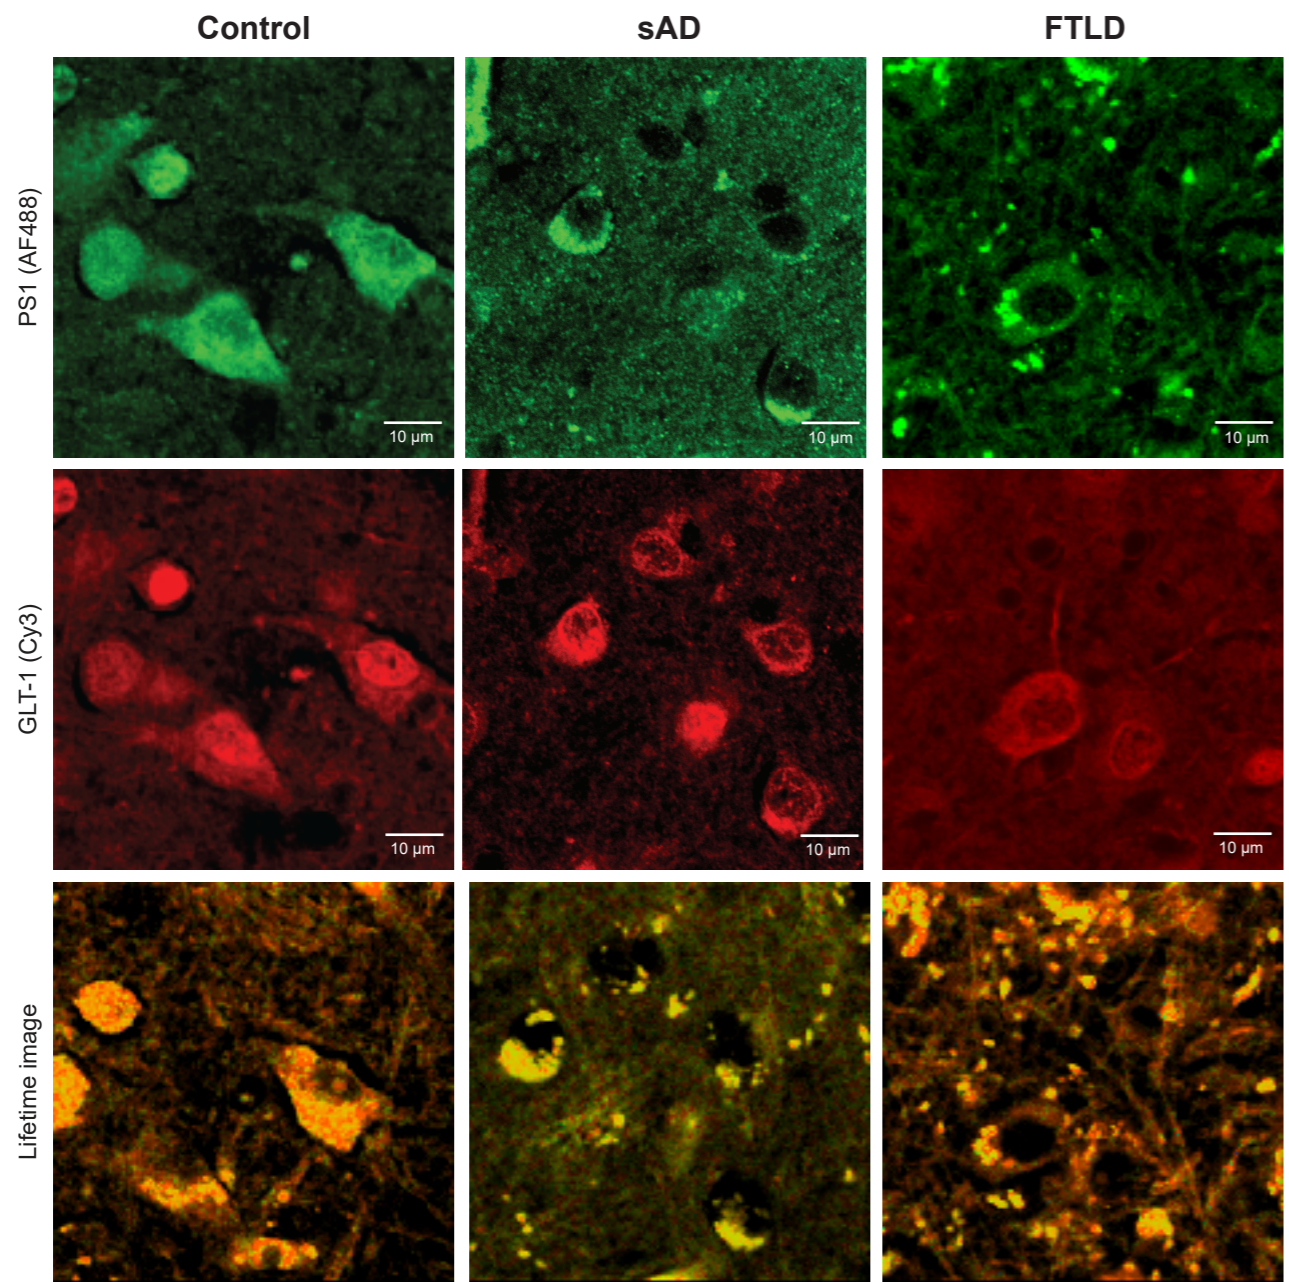**b**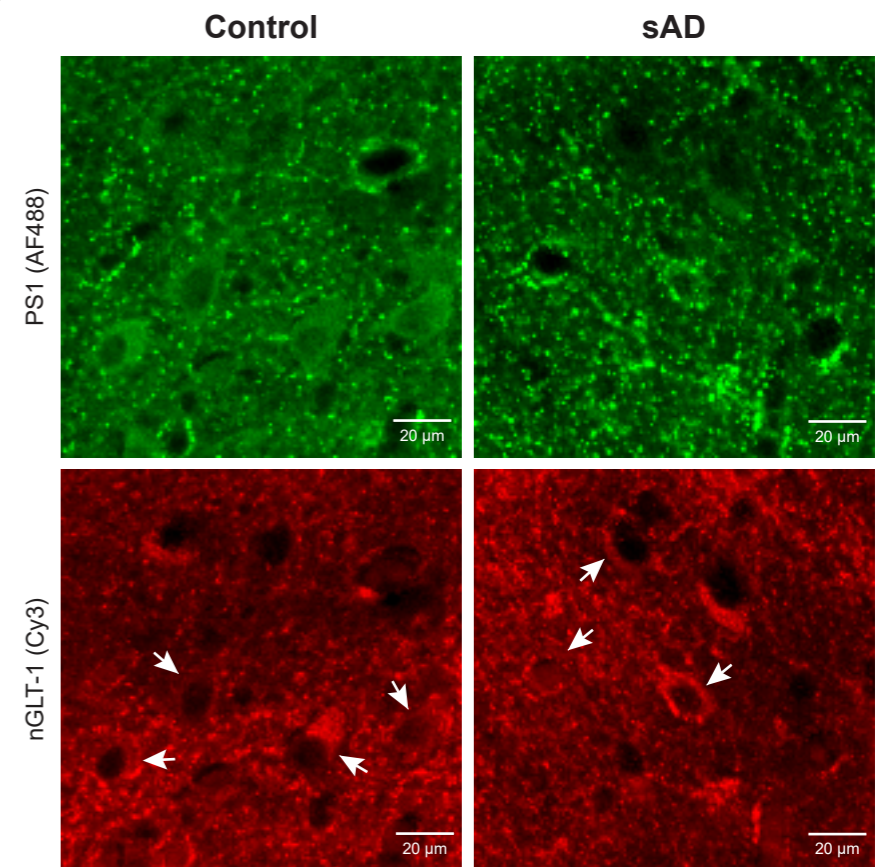

Supplement: 40478_2024_1876_MOESM1_ESM.pdf [file 40478_2024_1876_MOESM1_ESM.pdf]

a

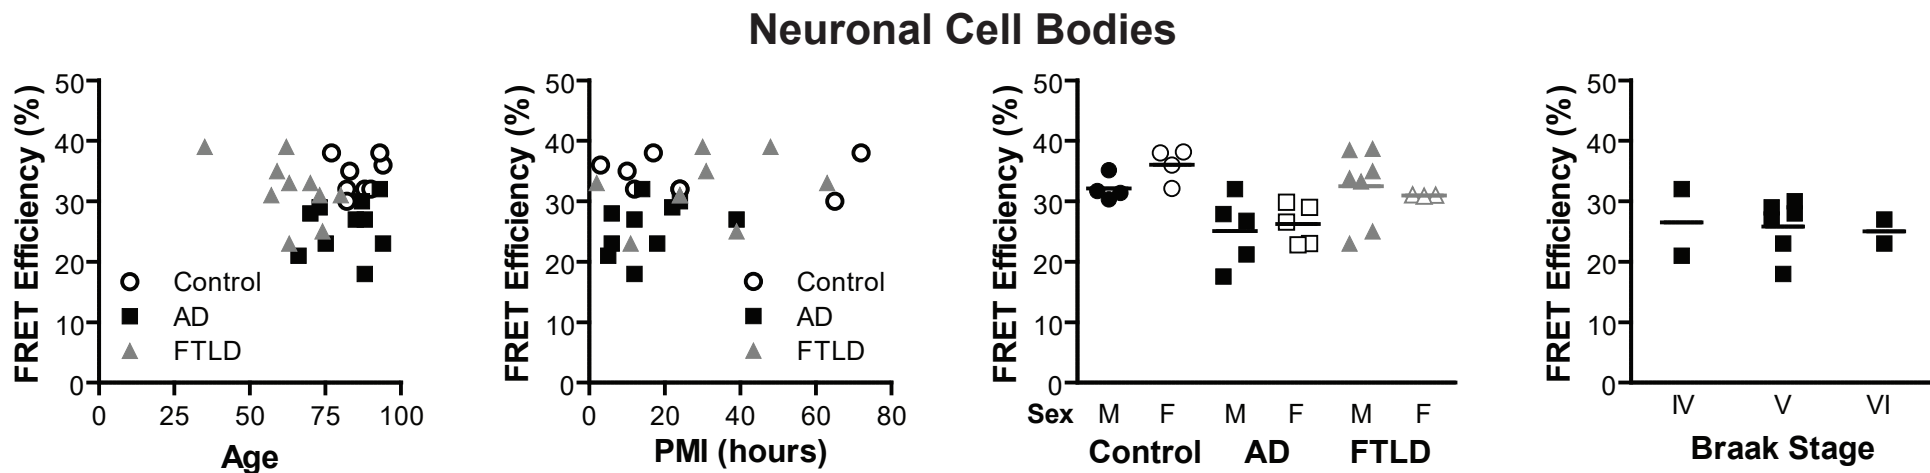

b

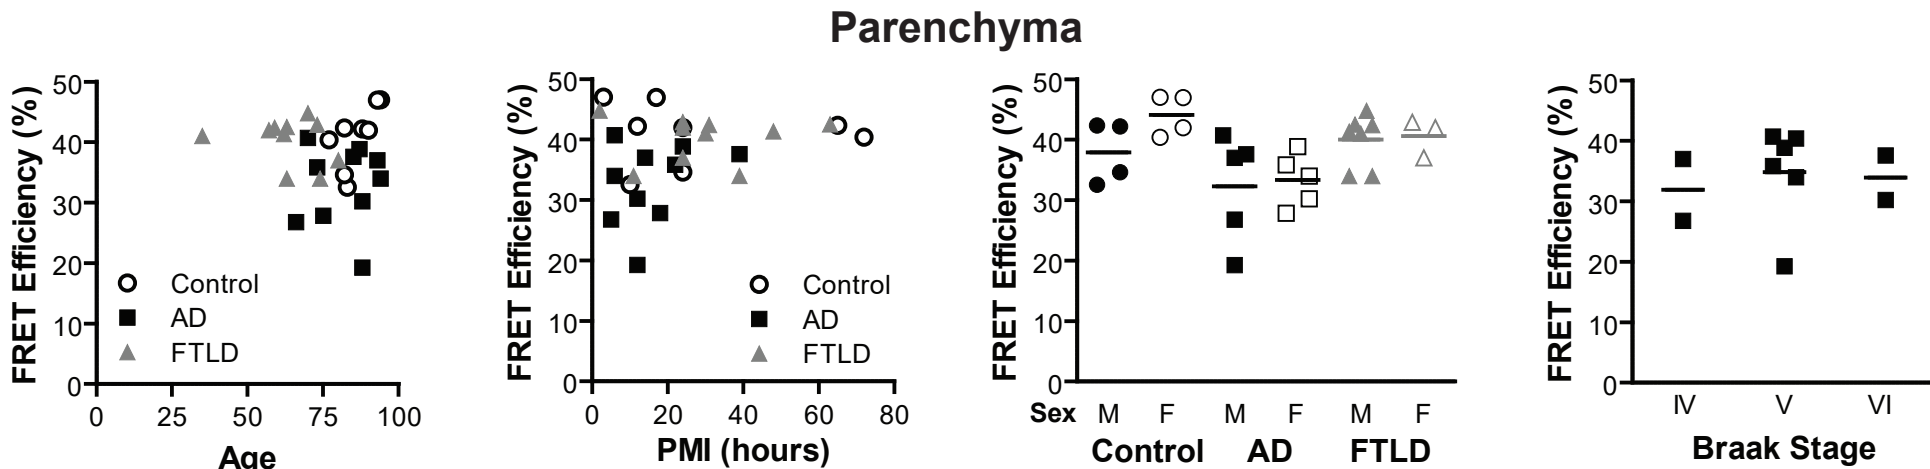

Supplement: 40478_2024_1876_MOESM2_ESM.pdf [file 40478_2024_1876_MOESM2_ESM.pdf]

a

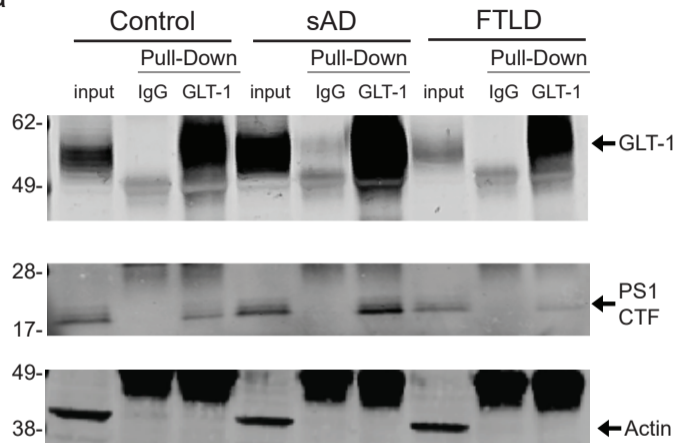

b

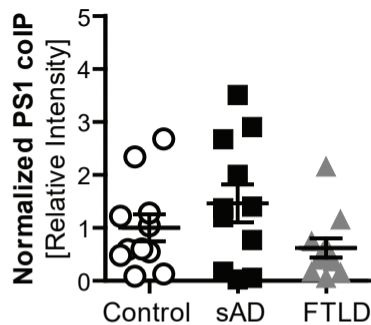

Supplement: 40478_2024_1876_MOESM3_ESM.pdf [file 40478_2024_1876_MOESM3_ESM.pdf]

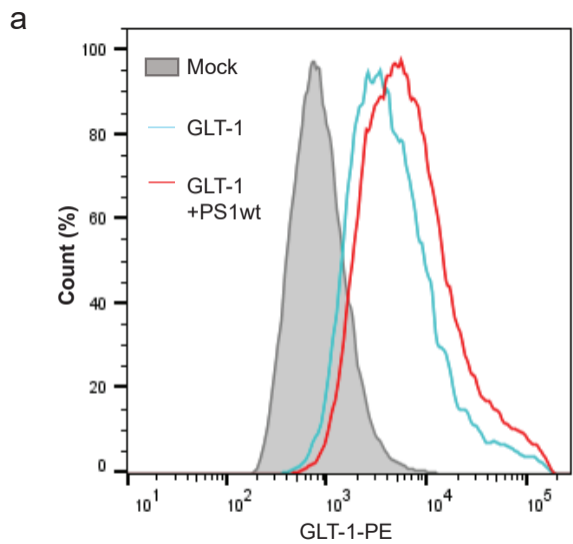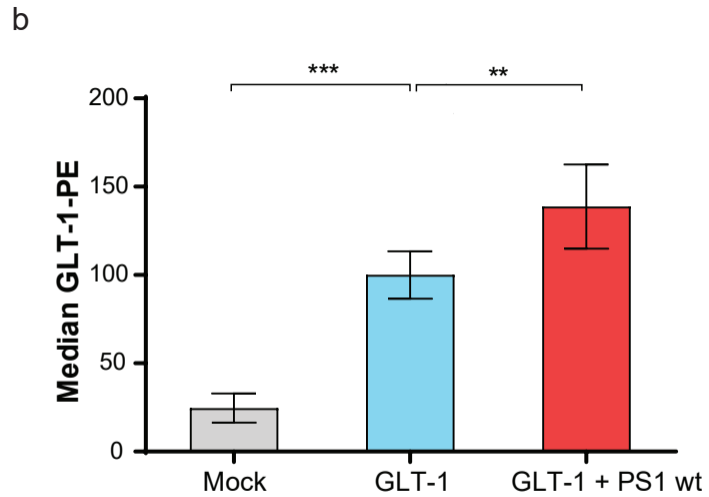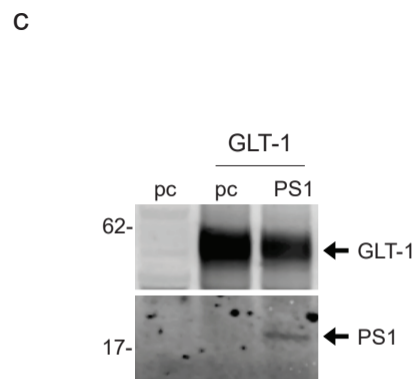

Supplement: 40478_2024_1876_MOESM4_ESM.pdf [file 40478_2024_1876_MOESM4_ESM.pdf]

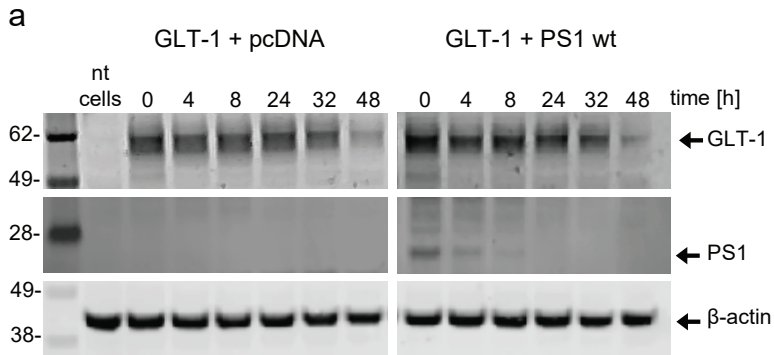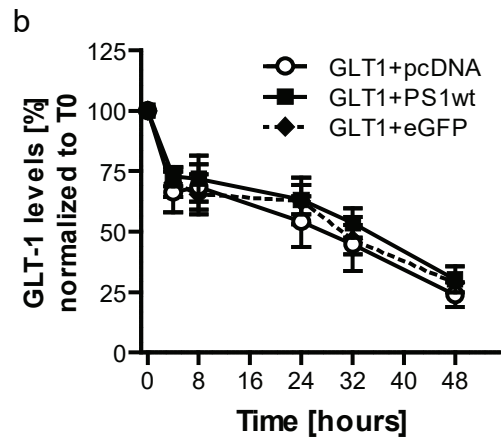

Supplement: 40478_2024_1876_MOESM5_ESM.pdf [file 40478_2024_1876_MOESM5_ESM.pdf]

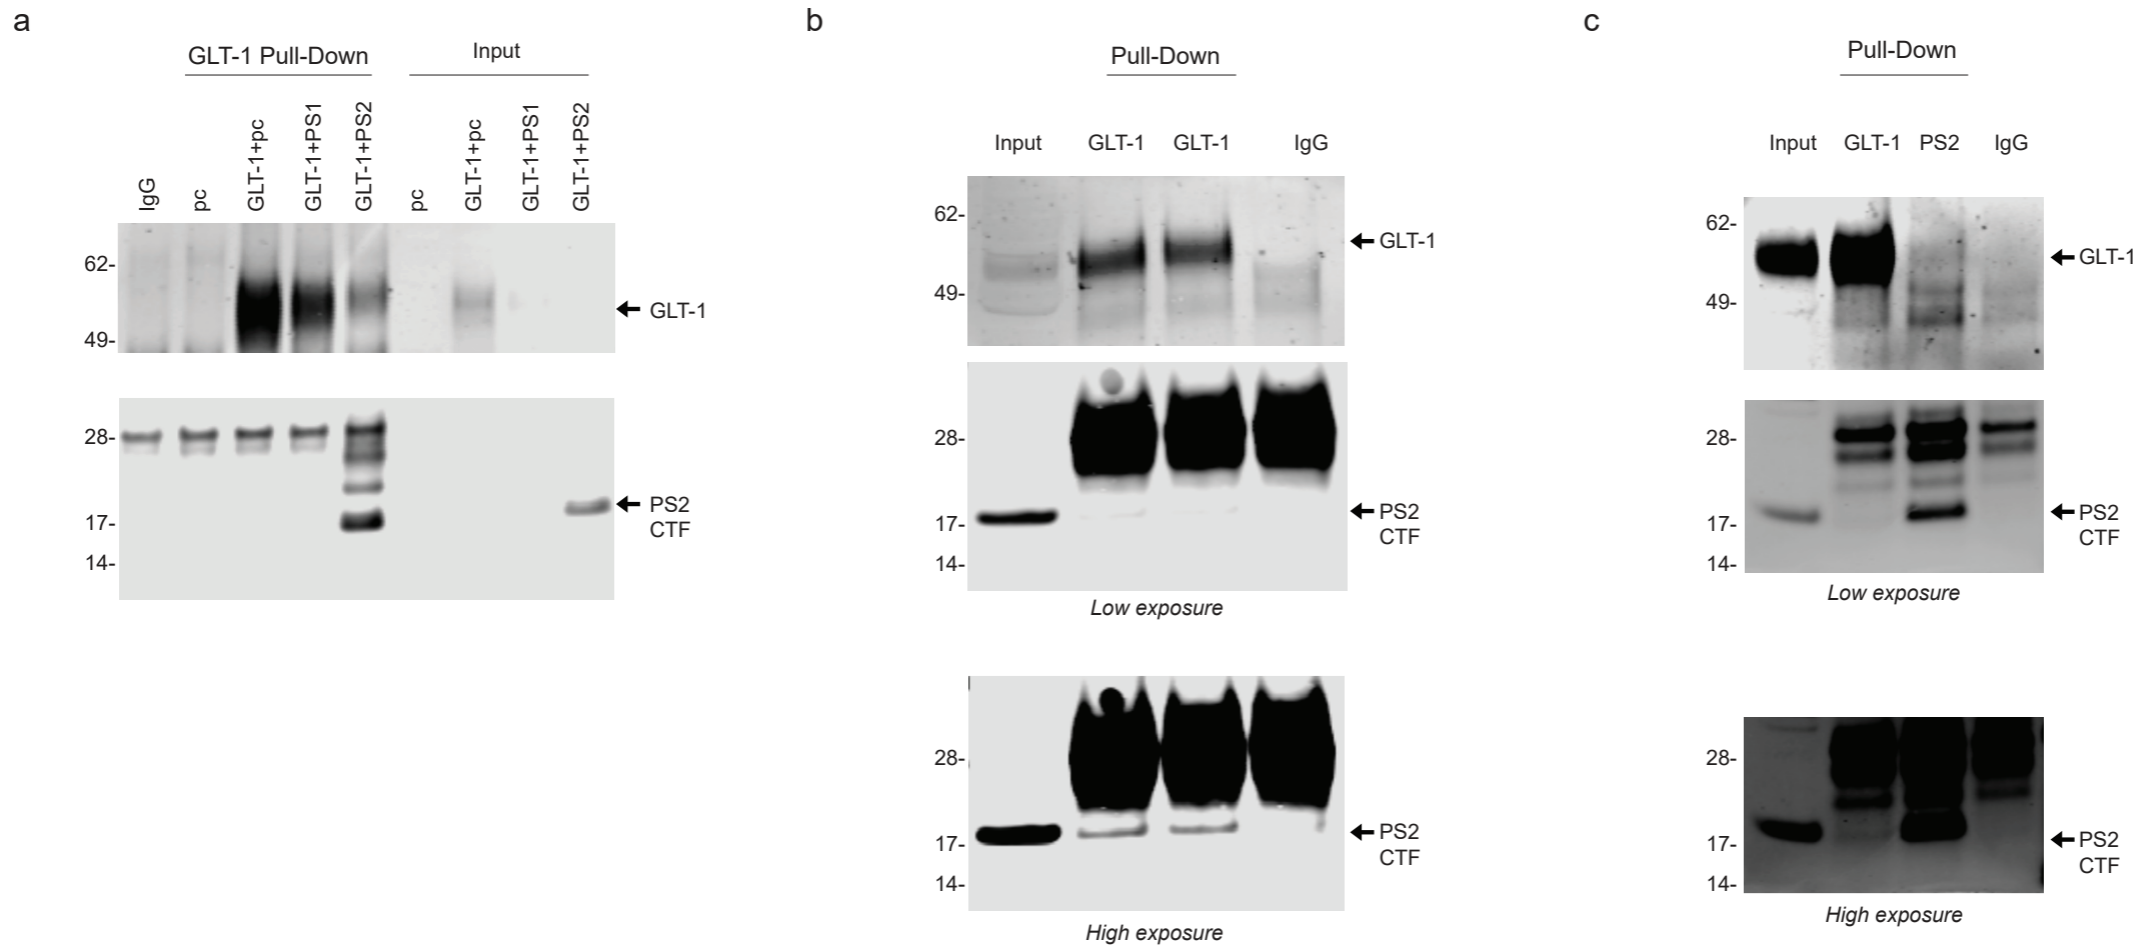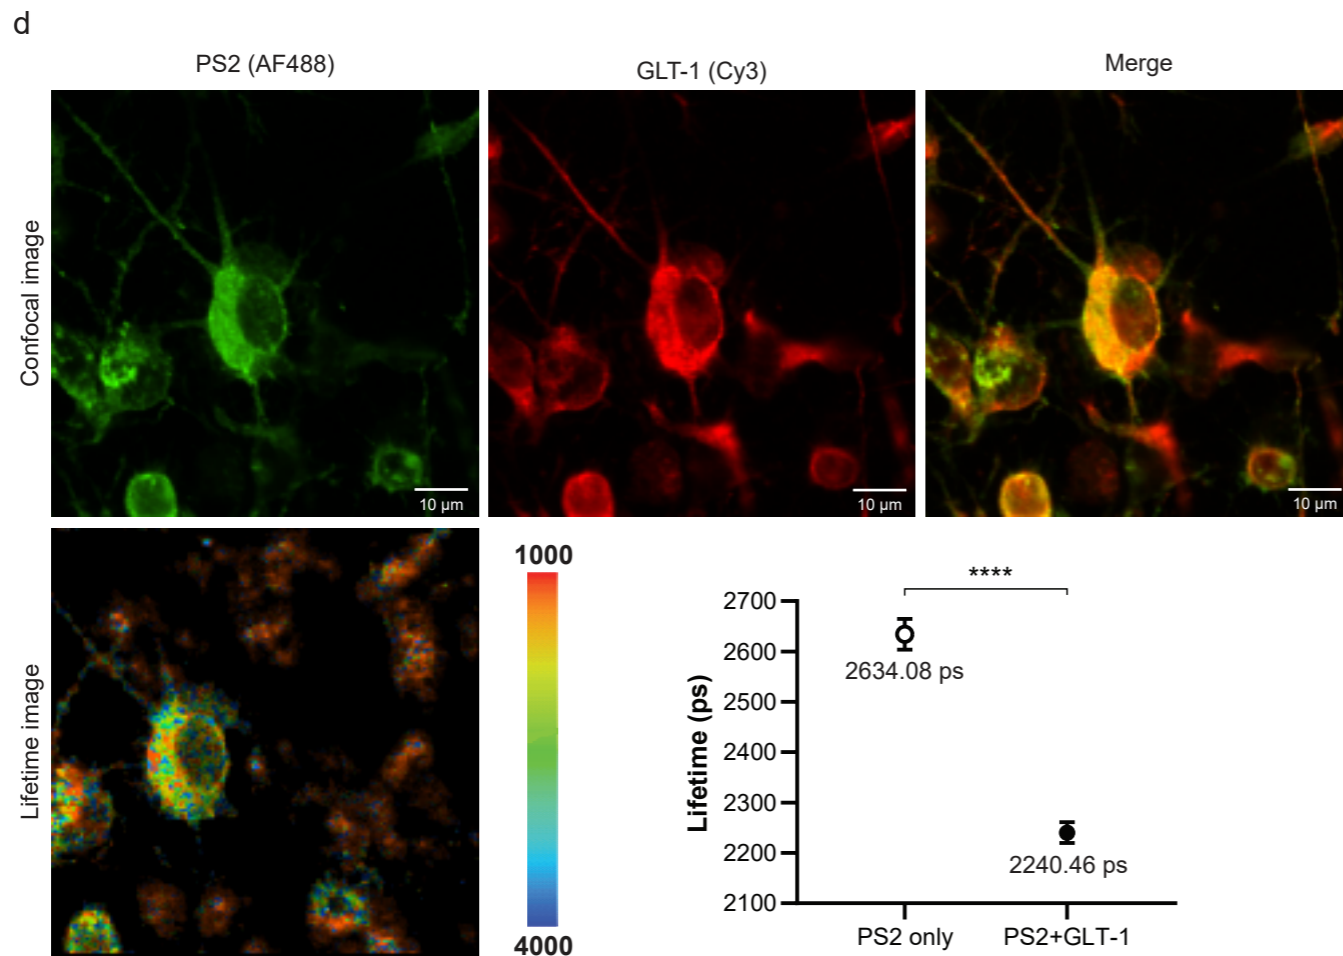

Supplement: 40478_2024_1876_MOESM6_ESM.pdf [file 40478_2024_1876_MOESM6_ESM.pdf]
